# 1 **5' Modifications Improve Potency and Efficacy of DNA Donors for Precision** 2 **Genome Editing**

3  
4 Krishna S Ghanta<sup>1,9</sup>, Zexiang Chen<sup>1,9</sup>, Aamir Mir<sup>1,10</sup>, Gregoriy A Dokshin<sup>1,10</sup>, Pranathi M  
5 Krishnamurthy<sup>1</sup>, Yeonsoo Yoon<sup>3</sup>, Judith Gallant<sup>3,11</sup>, Ping Xu<sup>3,11</sup>, Xiao-Ou Zhang<sup>4</sup>, Ahmet  
6 Ozturk<sup>1</sup>, Masahiro Shin<sup>5</sup>, Feston Idrizi<sup>5</sup>, Pengpeng Liu<sup>5</sup>, Hassan Gneid<sup>1,2</sup>, Nathan D Lawson<sup>5,6,7</sup>,  
7 Jaime A Rivera-Pérez<sup>3</sup>, Erik J Sontheimer<sup>1,6,7\*</sup>, Jonathan K Watts<sup>1,2\*</sup> and Craig C Mello<sup>1,7,8\*</sup>  
8  
9

## 10 **Author Affiliations:**

- 11 1. RNA Therapeutics Institute, University of Massachusetts Medical School, Worcester,  
12 MA 01605
- 13 2. Department of Biochemistry and Molecular Pharmacology, University of Massachusetts  
14 Medical School, Worcester, Massachusetts 01605
- 15 3. Department of Pediatrics, Division of Genes and Development, University of  
16 Massachusetts Medical School, Worcester, MA
- 17 4. Program in Bioinformatics and Integrative Biology, University of Massachusetts Medical  
18 School, Worcester, MA
- 19 5. Department of Molecular, Cell and Cancer Biology, University of Massachusetts Medical  
20 School, Worcester, Massachusetts, USA
- 21 6. Li Weibo Institute for Rare Diseases Research, University of Massachusetts Medical  
22 School, Worcester, MA, USA
- 23 7. Program in Molecular Medicine, University of Massachusetts Medical School, 368  
24 Plantation Street, Worcester, MA, 01605 United States
- 25 8. Howard Hughes Medical Institute, University of Massachusetts Medical School,  
26 Worcester, MA, USA
- 27 9. These authors contributed equally
- 28 10. These authors contributed equally
- 29 11. These authors contributed equally

30 Present Address- A.M: Inscripta Therapeutics, Pleasanton, CA; G.A.D: Vertex  
31 Pharmaceuticals, Boston, MA; P.M.K: Bristol Myer Squibb, Cambridge MA.

32 \* Correspondence to [Erik.Sontheimer@umassmed.edu](mailto:Erik.Sontheimer@umassmed.edu), [Jonathan.Watts@umassmed.edu](mailto:Jonathan.Watts@umassmed.edu),  
33 [Craig.Mello@umassmed.edu](mailto:Craig.Mello@umassmed.edu).  
34

35 **Running Title:** Modified donors improve HDR efficacy.

36 **Key Words:** CRISPR, HDR, Modified donors, Chemical modifications

37 **Corresponding Authors:** Erik J. Sontheimer, Jonathan K. Watts and Craig C. Mello

38 **Mailing Address:**

39 RNA Therapeutics Institute,

40 University of Massachusetts Medical School,

41 368 Plantation Street, AS5-2049

42 Worcester, MA 01605, USA.

43 Phone: 508-845-1602

## 44 **Abstract**

45 **Nuclease-directed genome editing is a powerful tool for investigating physiology and has**  
46 **great promise as a therapeutic approach to correct mutations that cause disease. In its most**  
47 **precise form, genome editing can use cellular homology-directed repair (HDR) pathways to**  
48 **insert information from an exogenously supplied DNA repair template (donor) directly into**  
49 **a targeted genomic location. Unfortunately, particularly for long insertions, toxicity and**  
50 **delivery considerations associated with repair template DNA can limit HDR efficacy. Here,**  
51 **we explore chemical modifications to both double-stranded and single-stranded DNA-repair**  
52 **templates. We describe 5'-terminal modifications, including in its simplest form the**  
53 **incorporation of triethylene glycol (TEG) moieties, that consistently increase the frequency**  
54 **of precision editing in the germlines of three animal models (*Caenorhabditis elegans*,**  
55 **zebrafish, mice) and in cultured human cells.**

## 57 **Introduction**

58 Precision genome editing by HDR often requires cells to use exogenously supplied DNA templates  
59 (donors) to repair targeted double-strand breaks (DSBs). Maximizing precision genome editing,  
60 therefore, requires understanding both how cells respond to DSBs and to exogenous donors. These  
61 responses can be influenced by many variables, including cell-intrinsic factors (e.g., genetics, cell  
62 type, and cell cycle stage) and cell-extrinsic factors (e.g., donor length, strandedness, and  
63 chemistry)<sup>1-11</sup>. Each of these variables can influence the relative efficiency of HDR compared to  
64 competing DSB repair pathways, such as non-homologous end joining (NHEJ)<sup>12-15</sup>.

65 In many organisms and cell types, high HDR efficiencies are readily achieved using short  
66 single-stranded oligodeoxynucleotide (ssODN) donor templates that permit single base changes or  
67 short insertions or deletions. However, HDR is frequently less efficient when longer double-  
68 stranded DNA (dsDNA) templates are used as donors. It is not known why longer DNA donors  
69 yield lower rates of HDR. In many cell types, high concentrations of dsDNA cause cytotoxicity,  
70 limiting the number of long donor molecules that can be safely delivered into cells. In addition,

71 due to their size, long donor molecules may not transit the nuclear envelope as efficiently, reducing  
72 the effective concentration at the site of repair, or requiring cell division to gain access to the target  
73 locus. Moreover, end-joining ligation reactions assemble linear dsDNA molecules into  
74 concatemers in eukaryotic cells<sup>16-20</sup>, further limiting the number of individual donor molecules  
75 and their ability to diffuse to their DSB target sites.

76 In an effort to improve nuclear delivery and HDR efficacy, we incorporated 5'  
77 modifications into the donor molecules, including a simple triethylene glycol (TEG) moiety, a 2'-  
78 O-methyl (2'OMe) RNA::TEG modification, and a peptide nucleic acid (PNA) comprising the  
79 SV40 nuclear localization signal (NLS) (see Methods). These 5' modified donors increased the  
80 efficiency of templated repair by 2- to 5-fold in cultured mammalian cells as well as germline  
81 editing of *Caenorhabditis elegans*, zebrafish (*Danio rerio*) and mouse (*Mus musculus*). The  
82 modified donors exhibited a striking reduction in DNA ligation reactions including reduced self-  
83 ligation into concatemers and reduced sequence-independent ligation into cellular DSBs,  
84 suggesting that the 5' modifications reduce the availability of 5' ends for competing NHEJ  
85 reactions.

86

## 87 **Results**

### 88 **End-modified DNA donors increase the efficiencies of HDR in mammalian cells**

89 To examine the effects of donor end modifications on HDR in cultured mammalian cells, we took  
90 advantage of a modified traffic light reporter (TLR) comprising a “broken” GFP coding region  
91 followed by a frameshifted mCherry coding region<sup>21, 22</sup>. Cas9 targets the “broken” GFP, which  
92 can only be made functional if precisely repaired by HDR, resulting in green fluorescence. If Cas9-  
93 mediated DSBs are imprecisely repaired by NHEJ, approximately one third of the imprecise repair

94 events will restore the reading frame of mCherry, resulting in red fluorescence. Cas9 and single  
95 guide RNA (sgRNA) expression vectors and dsDNA donors with or without 5' modifications were  
96 electroporated into HEK293T TLR cells (**Figure 1A**), followed by flow cytometry to determine  
97 the percentage of cells expressing either GFP or mCherry.

98 We first examined the performance of dsDNA donors modified with 15-nucleotide (nt)  
99 2'OMe-RNA fused to triethylene glycol (RNA::TEG). Strikingly, the frequency of HDR increased  
100 with the amount of RNA::TEG-modified donor to a maximal 52% GFP+ cells at 1.2 pmol of donor  
101 before falling off at higher amounts of donor (**Figure 1B**). By contrast, a maximum HDR  
102 frequency of only 25% GFP+ cells was observed at 1.6 pmol of unmodified donor. Notably, 0.4  
103 pmol RNA::TEG-modified donor was as efficient as 1.6 pmol unmodified donor, suggesting that  
104 the modified donor is ~4-fold more potent than the unmodified donor (**Figure 1B**). The increase  
105 in GFP+ cells was accompanied by a corresponding reduction in mCherry+ cells (**Figure 1C**).

106 We reasoned that that the 2'-O-Methyl RNA linker could be used to anneal PNA oligos  
107 attached to peptides that might enhance nuclear uptake. To test this idea, we produced  
108 complementary peptide-nucleic acid (PNA) oligos linked to a nuclear localization signal peptide  
109 or complementary PNA alone and tested these for HDR. Annealing these PNA oligos was well  
110 tolerated and did not diminish HDR, however neither did they enhance HDR (**Figure S1A-D**).  
111 Thus, further study will be needed to determine if RNA-TEG adapters can be used to append  
112 peptides or other molecules (e.g. CAS9 RNP) that stimulate HDR.

113 We next used the TLR assay to define features of the RNA::TEG moiety that promote  
114 maximal HDR. Nucleofection of 1.2 pmol donors modified with 2'OMe-RNA, TEG, or covalent  
115 RNA::TEG moieties all boosted HDR while reducing NHEJ events (**Figure 1D and E**). Increasing  
116 the length of the ethylene glycol moiety (3, 6, or 12 repeats) supported similar levels of HDR with

117 or without the 2'OMe-RNA moiety (**Figure 1F**). Finally, donors with TEG modification at both 5'  
118 ends yielded slightly better HDR efficiencies than donors with modification at only one of the two  
119 5' ends (**Figure 1G**). However, donors with RNA::TEG modification at both 5' ends or at only one  
120 of the 5' ends yielded similar HDR efficiencies (**Figure 1G**).

121 To explore the utility of TEG- and RNA::TEG-modified donors for repair at other genomic  
122 loci, we generated donors to integrate full-length *eGFP* at the endogenous *TOMM20*, *GAPDH*,  
123 and *SEC61B* loci (**Figure 2A**). We found that TEG or RNA::TEG donors consistently exhibited  
124 increased HDR levels in HEK293T cells as measured by the fraction of cells expressing eGFP at  
125 *TOMM20* (2-fold), at *GAPDH* (3-fold), and at *SEC61B* (5-fold) when compared to unmodified  
126 dsDNA donor (**Figure 2B-D**). RNA::TEG-modified donors also substantially increased HDR in  
127 two cell types that are less amenable to editing, increasing HDR at the *TOMM20* locus in human  
128 foreskin fibroblasts (HFF) cells (2.3-fold) and at the *Gapdh* locus in Chinese hamster ovary (CHO)  
129 cells (6-fold) (**Figure 2E-F**).

130 Next, to quantify the nature of repair outcomes (precise and imprecise), we employed deep  
131 sequencing assays. To facilitate sequencing across the repair site, we replaced a 12-nt sequence  
132 with a 9-nt sequence at the *EMX1* locus in HEK293T. We compared HDR efficiencies in this assay  
133 using unmodified, TEG-modified, and RNA::TEG-modified dsDNA donors with 90-base pair (bp)  
134 homology arms (**Figure 2G**). At 1.2 pmol and 2.4 pmol, RNA::TEG modified donors yielded two  
135 fold more precise edits compared to the unmodified donors. When even higher doses (5pmol) were  
136 used, the gap in efficacy between unmodified and RNA::TEG modified donors narrowed to just  
137 16% (89.5% vs 72.8%) precise reads (**Figure 2H**). The *EMX1* donor with 90-bp homology arms  
138 also supported high levels of HDR in K562 cells across a broad dose range. Notably, low doses of  
139 donor supported higher levels of HDR in K562 cells than in HEK293T cells, suggesting that K562

140 cells are more susceptible to editing (**Figure S2**). In this assay, donors modified with TEG alone  
141 exhibited no benefit over unmodified donors (**Figure 2H** and **Figure S2**).

142

### 143 **5'-modification increases potency of single-stranded DNA donors**

144 The experiments described thus far employed dsDNA donors; however, long single-stranded DNA  
145 (ssDNA) or short single-stranded oligo deoxynucleotide (ssODN) donors are also widely used in  
146 many HDR editing protocols. We therefore decided to explore how 5' end modifications affect  
147 single stranded donors of different lengths. Using the TLR assay, we found that addition of  
148 RNA::TEG at the 5' end of a long (800-nt) ssDNA donor significantly boosted HDR compared to  
149 the unmodified ssDNA donor. The frequency of HDR increased with the dose of ssDNA donor,  
150 reaching maximal HDR (22.5% GFP(+)cells) at 6 pmol to 8 pmol donor amounts (**Figure 3A**,  
151 **Figure S3A**). The RNA::TEG-modified donor was greater than 4-fold more potent than the  
152 unmodified donor reaching a threshold of 16% GFP(+) cells at a concentration of approximately  
153 2 pmol whereas achieving the same threshold of 16% required 8 pmol of unmodified donor  
154 (**Figure 3A**).

155 High yields of HDR in cultured mammalian cells have been achieved using short synthetic  
156 single-stranded oligo deoxynucleotide (ssODN) donors <sup>23</sup>. To test 5'-modified ssODNs for HDR  
157 efficacy, we used a sensitive GFP-to-BFP conversion assay in K562 cells. Precise editing converts  
158 a functional GFP sequence to blue fluorescent protein (BFP) sequence, producing cells that are  
159 GFP(-) and BFP(+). Imprecise editing produces cells that are both GFP(-) and BFP(-) <sup>24</sup>. Using 66  
160 nt long ssODN donors and titrating the amount over a range of 0.01 to 40 pmol, we found that  
161 RNA::TEG and unmodified donors produced similar maximal levels of HDR (47.5% to 52.8%  
162 BFP(+) cells). However, maximal HDR required 10-fold less RNA::TEG-modified ssODN than

163 unmodified donors (**Figure 3B**). We also observed reduced levels of imprecise editing (GFP-  
164 negative and BFP-negative) as the frequency of HDR increased (**Figure S3B**). For both donor  
165 types, the decline in editing at higher doses correlated with the appearance of dead cells (data not  
166 shown), suggesting that dose-limiting toxicity scales with increased HDR potency.

167 The use of fully synthetic ssODN donors allowed us to explore additional modifications,  
168 including internal and 3' modifications. Interestingly, 2'OMe-RNA, RNA::TEG, or TEG moieties  
169 at the 3' terminus did not enhance HDR compared to unmodified ssODN, but they blocked the  
170 ability of 2'OMe-RNA, RNA::TEG, or TEG moieties at the 5' end to enhance HDR (**Figure 3C**,  
171 **Figure S4**). By contrast, HDR was neither enhanced nor impeded by phosphorothioate (PS)  
172 linkages placed at 5' or 3' terminal linkages at the doses tested (**Figure S4**). Taken together these  
173 findings suggest that the mechanism of HDR improvement requires an available 3'-OH.

174

## 175 **5'-modified donors promote precision germline editing in *C. elegans***

176 Efficient genome editing in *C. elegans* can be achieved by directly injecting mixtures of  
177 Cas9 ribonucleoprotein (RNP) complex and donor into the syncytial ovary<sup>25-27</sup>, producing dozens  
178 of independent precision editing events among the progeny of each injected animal<sup>28</sup>. We designed  
179 unmodified, TEG-modified, and RNA::TEG-modified donors to insert *gfp* at the *csr-1* locus or to  
180 correct *eft-3p::gfp* reporter that contains partial sequence of *gfp* (see Methods; **Figure 4A**). To  
181 monitor injection quality, we co-injected a plasmid encoding the transformation marker *rol-*  
182 *6(su1006)*, which produces the Roller phenotype. The TEG- and RNA::TEG-modified donors  
183 produced about twice as many GFP(+) progeny per injected animal than did the unmodified donor  
184 (**Figure 4B and E**, two representative broods per donor). Among the Roller cohort, which was  
185 previously shown to exhibit lower editing efficiency<sup>28</sup>, end-modified donors increased the fraction



186 of GFP(+) Roller progeny by several fold. For example, whereas the unmodified *eft-3* donor  
187 produced only 12.6% GFP-positive Rollers, the TEG- and RNA::TEG-modified *eft-3* donors  
188 produced 57.1% and 49% GFP-positive Rollers (**Figure 4C**). Similarly, GFP::CSR-1(+) Rollers  
189 increased from 8.8% (unmodified) to 28% (TEG) and 32.8% (RNA::TEG) (**Figure 4F**). TEG- and  
190 RNA::TEG-modified *eft-3* and *csr-1* donors produced >50% GFP(+) non-Roller progeny  
191 compared to roughly 22% (*eft-3*) and 30% (*csr-1*) GFP(+) non-Rollers produced by the unmodified  
192 donor (**Figure 4D and G**). Every GFP(+) animal tested transmitted the edit to the next generation  
193 (**Figure S5A and B**). Thus, compared to the unmodified donors, the 5'-TEG and 5'-RNA::TEG  
194 donors substantially increase the frequency of *gfp* insertion by HDR in the *C. elegans* germline.  
195 Strikingly, end-modified donors frequently yielded more than 100 independent GFP(+) F1  
196 progeny from a single injected hermaphrodite.

### 197 **5'-modified donors promote precision editing in vertebrate zygotes**

198 We next asked if donor 5'-modifications improve precision genome editing in zebrafish and mouse  
199 zygotes. For zebrafish genome editing, we designed 147-bp dsDNA donors to insert the 45-nt  
200 Avitag sequence into the 5' end of the *Hey2* coding sequence (**Figure 5A**). Unmodified or end-  
201 modified donors were co-injected with Cas12a RNPs into one-cell embryos (see Methods), and  
202 editing efficiencies were quantified by high-throughput sequencing using genomic DNA isolated  
203 24 hr after injection<sup>29</sup>. Strikingly, the frequency of precise editing was 11-fold higher with the  
204 RNA::TEG (4.4%) donor than with the unmodified donor (0.4%)(**Figure 5A**). The TEG-modified  
205 donor however failed to enhance precise editing in zebrafish zygotes (**Figure 5A**). The total level  
206 of editing was comparable in each condition as shown by the fraction of reads with indels (**Figure**  
207 **S6**).

208 To test whether RNA::TEG-modified donors enhance precise editing in mouse zygotes, we  
209 targeted the *Tyrosinase* (*Tyr*) and *Sox2* loci. First, we sought to convert the coat color of Swiss-  
210 Webster albino (*Tyr<sup>c</sup>*) mice to a pigmented phenotype (*Tyr<sup>c-cor</sup>*; *cor*: *corrected*) using a donor to  
211 replace the serine 103 codon (TCT) with a cysteine (TGC) codon. The donor also introduces six  
212 silent mutations to prevent the guide RNA from directing cleavage of the edited locus (**Figure**  
213 **5B**). We injected unmodified or RNA::TEG-modified donors with Cas9 RNPs into zygotes,  
214 transferred the embryos into pseudo-pregnant females, and quantified the repair efficiency by  
215 phenotyping the coat color of founder (F0) mice. The RNA::TEG-modified donor yielded more  
216 than twice as many pigmented F0 mice (37.9% uniform or mosaic) compared to unmodified donor  
217 (17.4%) (**Figure 5B, Figure S7A**). Strikingly, most (92%) of the edited founders produced by the  
218 RNA::TEG-modified donor had uniformly pigmented coats, whereas only 62.5% of the edited F0  
219 produced by the unmodified donor had a uniformly pigmented coat color (**Figure 5C; Figure**  
220 **S7A**), suggesting that the RNA::TEG-modified donor promotes editing during early zygotic  
221 divisions. Representative images of F0 litters with dark coat color are shown in **Figure 5D**. We  
222 confirmed that F0 mice with pigmented coat transmitted the corrected *Tyr<sup>c-cor</sup>* allele to F1 pups  
223 (**Figure S7B and C**). Taken together, these results show that RNA::TEG donors are at least two-  
224 fold more efficient than unmodified donors in mouse zygote editing.

225 Next, we sought to insert a sequence encoding an in-frame V5 epitope immediately before  
226 the stop codon at the 3' end of the *Sox2* locus (**Figure 5E**). We injected unmodified or RNA::TEG-  
227 modified donors with Cas9 RNPs into zygotes, transferred the embryos into pseudo-pregnant mice,  
228 and genotyped F0 progeny by PCR across the *Sox2* target site and Sanger sequencing. The V5 tag  
229 was precisely inserted into the *Sox2* locus in only 5.7% (n=35) of F0 animals from the injection  
230 with unmodified donor. By contrast, the RNA::TEG-modified donor resulted in precise insertion

231 of V5 in 33.3% (n=24) of the F0 animals—a greater than 5-fold increase in precise editing (**Figure**  
232 **5E and Figure S8A**). All of the V5-positive founders tested (one F0 from the unmodified donor  
233 and six F0s from RNA::TEG-modified donor) transmitted the *Sox2::V5* allele to F1 progeny and  
234 the insertion was confirmed by Sanger sequencing (**Figure S8B and C**). Thus the 5'-RNA::TEG  
235 modification greatly improves the efficiency of precise genome editing in vertebrate model  
236 systems.

237

### 238 **5'-modifications suppress donor concatenation**

239 Upon delivery into animal cells or embryos, linear DNA molecules are known to form extensive  
240 homology-mediated and ligation-dependent concatemers (**Figure 6A**)<sup>16-18</sup>. We reasoned that 5'  
241 modifications to the donor might suppress the formation of concatemers, thereby making linear  
242 donors more available for HDR. To test this idea, we nucleofected 566 bp dsDNA donors into  
243 HEK293T cells, harvested cells over a course of 3 days, and assessed the formation of concatemers  
244 by Southern blot analysis. We found that the unmodified dsDNA formed concatemers within 1  
245 hour after nucleofection. These concatemers were composed of two to several copies of the DNA,  
246 inferred from the presence of a ladder of bands on the Southern blot (**Figure 6B**). Concatemers of  
247 up to ten copies were present within 3 hours after nucleofection and peaked in abundance by 12  
248 hours. Concatemer levels declined over the next 12 hours but persisted at low levels until at least  
249 72 hours after nucleofection. By contrast, the TEG-modified DNA showed a marked delay in the  
250 formation and levels of multimers (**Figure 6B**). Dimers and trimers gradually formed over the first  
251 12 to 24 hours but were present at much lower levels than those formed by unmodified DNA. At  
252 late time points—24, 48, and 72 hours after transfection—we observed a greater fraction of TEG-

253 modified DNA monomers than unmodified monomers (**Figure 6B**). These results suggest that the  
254 5'-TEG modification significantly suppresses concatemer formation.

255

## 256 **End-modifications suppress direct ligation of short DNA into DSBs**

257 To determine if TEG modification suppresses the direct ligation of TEG-modified linear molecules  
258 into chromosomal DSBs, we performed GUIDE-seq analyses<sup>30</sup>, which measures the incorporation  
259 of short (34nt) dsDNA into on-target and off-target DSBs. We targeted the *ARHGEF9* locus,  
260 previously characterized for off-target editing<sup>31</sup>. Strikingly, the TEG-modified DNA produced 19-  
261 fold fewer GUIDE-seq reads (genome wide) than did the unmodified DNA (**Figure 6C**). The  
262 number of TEG-modified DNA insertions obtained at the on-target cut site in the *ARHGEF9* locus  
263 and at the top 6 off target sites were dramatically reduced, ranging from 15-fold to 6-fold lower  
264 compared to insertions of the unmodified DNA (**Figure 6D**). Taken together these data suggest  
265 that TEG-modifications suppress direct ligation of donor molecules both to each other and to  
266 chromosomal DSBs.

267

## 268 **Discussion**

269 Here we have explored how several types of chemical modifications to the repair template DNA  
270 affect the efficiency of precise homology-dependent repair. In mammalian cells, donors containing  
271 simple modifications such as TEG or 2'OMe-RNA::TEG on their 5' ends improved HDR efficacy.  
272 These modifications increased the potency of single- and double-stranded DNA (long and short)  
273 donors, allowing efficient editing at significantly lower amounts. Modifying the ends of the donors  
274 suppressed concatemer formation and significantly reduced random integration of short dsDNA at  
275 chromosomal DSBs.

276 End modifications affected long and short donors differently in mammalian cells. On long  
277 donors end modification caused a ~2-to-5-fold increase in HDR frequency (total efficacy)  
278 compared to unmodified donors and did so without changing the donor concentration where  
279 efficacy reached its plateau. In contrast, on short donors end modifications did not increase the  
280 maximal efficacy of HDR, but instead dramatically reduced the amount of donor required to reach  
281 that maximal level. Put another way, long DNA donors exhibited both increased potency and  
282 maximal efficacy when modified, while short ssODN and dsDNA donors exhibited increased  
283 potency but no increase in maximal efficacy. This difference requires further study but could be  
284 explained if shorter donors and longer DNA donors experience different dose-limiting barriers.  
285 For example, the dose-limiting toxicity of ssODNs could be driven by total number of free DNA  
286 ends per cell, while longer molecules could encounter dose-limiting toxicity driven by total DNA  
287 mass. Consistent with this idea, unmodified long dsDNA donors begin to plateau in efficacy at  
288 nearly 4-fold more mass, but ~10-fold lower molar amounts than ssODNs. When end-modified,  
289 both types of donor exhibit similar maximal efficacy in the 1 to 2 pmol range.

290 RNA::TEG-modified donors significantly increased the levels of precision editing in three  
291 different model organisms (*C. elegans*, zebrafish, and mice). In all three animals, high HDR  
292 efficiencies were achieved using end-modified dsDNA donors, that in some cases approached  
293 efficiencies previously observed for ssODN donors<sup>27, 32</sup>. Importantly, precise insertions were  
294 obtained with relatively short homology arms. For example, in mouse zygote injections, we used  
295 donors with homology arms of less than 90 bp, similar to typical arm lengths used for ssODN  
296 donors<sup>33</sup> and at relatively low concentrations (1 ng/ $\mu$ l).

297 How do end-modifications help increase the efficacy of the donors? Our findings suggest  
298 that they do so, in part, by suppressing non-homologous end-joining reactions. In several systems

299 dsDNA donors have been shown to quickly form extrachromosomal arrays<sup>16-18</sup> and may do so  
300 directly in the cytoplasm<sup>34</sup>. For example, DNA delivered into the cytoplasm of the *C. elegans*  
301 gonadal syncytium gains entry into oocytes over a 24 hour period in a manner more consistent  
302 with cytoplasmic flow than with direct nuclear uptake by germ nuclei<sup>28</sup>, and transformants  
303 established in this way have been shown to contain concatenated arrays of injected DNA, several  
304 hundred kilobases in length, which then partition to progeny in a non-Mendelian fashion as  
305 extrachromosomal elements<sup>18, 35</sup>. Integration of similar extrachromosomal arrays into the host  
306 genome have been reported in zebrafish and mouse zygotes<sup>19, 20, 36</sup>. Thus, the suppression of donor  
307 concatemer formation by 5' modified donors could increase the effective molar amounts of donor  
308 available for precise repair of the target double strand break. Similarly, once in the nucleus, the  
309 suppression of direct ligation to chromosomal DNA through end-joining reactions could further  
310 increase precision repair. Perhaps consistent with suppression of concatenation as a major  
311 mechanism of action, it is intriguing that modification of a single end was nearly as effective as  
312 modifications to both ends of the donor. In principle, a single end modification would limit  
313 concatenation to dimer formation. Similarly, modification of a single end could prevent donors  
314 from ligating into circles which might then concatenate further through HDR.

315 In addition to increasing the amount of available donor molecules, another possible benefit  
316 of suppressing end-joining reactions is that the free ends of the donor might then be available to  
317 participate in the HDR mechanism (for example, by assembling elements of the DSB repair  
318 machinery directly on the free 3'-end of the donor). We found that a free unmodified 3' end was  
319 required for efficient HDR. Thus, by suppressing ligation, the 5' modification in effect maintains  
320 available 3' ends, perhaps to prime repair synthesis.

321 In previous studies, fluorescent and amine modifications to the 5' and 3' termini of ssODN  
322 donors did not improve HDR efficacy over unmodified donors <sup>37</sup>. However, these studies were  
323 performed using doses 50-fold higher than the optimal dose for modified donors determined here.  
324 Similarly, phosphorothioate (PS) linkages were shown to improve HDR at doses much higher than  
325 the optimal dose for modified ssODNs in our study <sup>4</sup>. In our study, ssODNs with PS linkages did  
326 not improve HDR at doses where RNA::TEG- and TEG-modified donors were most efficacious.  
327 While our study was in preparation <sup>38</sup>, three studies explored donors with 5'-end modifications.  
328 One study showed that the addition of biotin improved HDR and favored single copy insertion in  
329 the rice fish medaka <sup>39</sup>. The biotin moiety was attached to the donor via a polyethylene glycol  
330 (PEG) linker, but the study did not explore donors with PEG alone. Yu et al. (2020) showed that  
331 PEG10 with a 6-carbon linker boosted precise GFP insertions in vertebrate cells similar to those  
332 reported here for TEG- and RNA::TEG-modified donors, and at similar concentrations to those  
333 we employed <sup>40</sup>. The third study describes the suppression of NHEJ-mediated insertions using  
334 donors with 5'-Biotin::PEG or 5'-ssDNA::PEG moieties <sup>41</sup>. Our studies are in agreement with these  
335 findings and extend them to additional modifications and to *in vivo* genome-editing applications  
336 in three animal systems.

337 We do not understand why donors modified with TEG and RNA::TEG performed similarly  
338 in *C. elegans*, while RNA::TEG was consistently superior to TEG alone in zebrafish and human  
339 cells. The *C. elegans* system is unique in that it targets meiotic pachytene nuclei that are actively  
340 engaged in HDR. Perhaps donors must persist longer to engage the DSB repair machinery in  
341 mitotic cells. The RNA::TEG modification might therefore facilitate editing in mitotic cells by  
342 providing better protection from nuclease activity compared to TEG alone. PS linkages are known  
343 to protect against nuclease activity <sup>4</sup>, and it will therefore be interesting to explore whether a

344 combination of internal (e.g., PS linkages) and terminal (e.g., 5'-RNA::TEG or 5'-TEG)  
345 modifications can further increase HDR efficacy. Indeed, our results should incite the search for  
346 additional chemistries that could boost donor stability while still allowing the donor to serve as a  
347 template for repair polymerases; some such studies are underway in our laboratories. Future  
348 studies will also need to explore whether the incorporation of donor chemistries will synergize  
349 with other methods that stimulate HDR <sup>1, 2, 14, 15, 42-44</sup>.



350 **Acknowledgements.** This work was funded by Howard Hughes Medical Institute (C.C.M.), NIH  
351 R37GM058800-23 (C.C.M), institutional funds from University of Massachusetts Medical School  
352 (E.J.S and J.K.W), NIH UG3 TR002668 (E.J.S and J.K.W), NIH/NHLBI R35 HL140017 (N.D.L)  
353 and NIH/OD R21 OD030004 (N.D.L). We thank Darryl Conte, Jr. for critical reading of the  
354 manuscript, Scot Wolfe for sharing the Cas9 expression plasmid, Julia Rembetsy-Brown for  
355 maintaining *Sox2::V5* mouse colony and Alireza Edraki for help with PCRs of some human  
356 dsDNA donors. Biorender was used to generate some of the graphics in figures. We thank the  
357 UMass Medical School Deep Sequencing Core for their assistance with the Illumina and PacBio  
358 sequencing.

359 **Competing interests:** The authors (K.S.G, A.M, G.A.D, H.G, J.K.W, E.J.S and C.C.M) have a  
360 patent application pending related to the findings described. Craig C. Mello is a co-founder and  
361 Scientific Advisory Board member of CRISPR Therapeutics, and Erik J. Sontheimer is a co-  
362 founder and Scientific Advisory Board member of Intellia Therapeutics.

## 363 References

- 364 1. Lin, S., Staahl, B.T., Alla, R.K. & Doudna, J.A. Enhanced homology-directed human  
365 genome engineering by controlled timing of CRISPR/Cas9 delivery. *Elife* **3**, e04766  
366 (2014).
- 367 2. Wienert, B. et al. Timed inhibition of CDC7 increases CRISPR-Cas9 mediated templated  
368 repair. *Nat Commun* **11**, 2109 (2020).
- 369 3. Nambiar, T.S. et al. Stimulation of CRISPR-mediated homology-directed repair by an  
370 engineered RAD18 variant. *Nat Commun* **10**, 3395 (2019).
- 371 4. Renaud, J.B. et al. Improved Genome Editing Efficiency and Flexibility Using Modified  
372 Oligonucleotides with TALEN and CRISPR-Cas9 Nucleases. *Cell Rep* **14**, 2263-2272  
373 (2016).
- 374 5. Rees, H.A., Yeh, W.H. & Liu, D.R. Development of hRad51-Cas9 nickase fusions that  
375 mediate HDR without double-stranded breaks. *Nat Commun* **10**, 2212 (2019).
- 376 6. Jayathilaka, K. et al. A chemical compound that stimulates the human homologous  
377 recombination protein RAD51. *Proc Natl Acad Sci U S A* **105**, 15848-15853 (2008).
- 378 7. Pinder, J., Salsman, J. & Dellaire, G. Nuclear domain 'knock-in' screen for the evaluation  
379 and identification of small molecule enhancers of CRISPR-based genome editing. *Nucleic  
380 Acids Res* **43**, 9379-9392 (2015).
- 381 8. Riesenberger, S. & Maricic, T. Targeting repair pathways with small molecules increases  
382 precise genome editing in pluripotent stem cells. *Nat Commun* **9**, 2164 (2018).
- 383 9. Yu, C. et al. Small molecules enhance CRISPR genome editing in pluripotent stem cells.  
384 *Cell Stem Cell* **16**, 142-147 (2015).
- 385 10. Canny, M.D. et al. Inhibition of 53BP1 favors homology-dependent DNA repair and  
386 increases CRISPR-Cas9 genome-editing efficiency. *Nat Biotechnol* **36**, 95-102 (2018).
- 387 11. Robert, F., Barbeau, M., Ethier, S., Dostie, J. & Pelletier, J. Pharmacological inhibition of  
388 DNA-PK stimulates Cas9-mediated genome editing. *Genome Med* **7**, 93 (2015).
- 389 12. Frank-Vaillant, M. & Marcand, S. Transient stability of DNA ends allows nonhomologous  
390 end joining to precede homologous recombination. *Mol Cell* **10**, 1189-1199 (2002).
- 391 13. Mao, Z., Bozzella, M., Seluanov, A. & Gorbunova, V. Comparison of nonhomologous end  
392 joining and homologous recombination in human cells. *DNA Repair (Amst)* **7**, 1765-1771  
393 (2008).
- 394 14. Chu, V.T. et al. Increasing the efficiency of homology-directed repair for CRISPR-Cas9-  
395 induced precise gene editing in mammalian cells. *Nat Biotechnol* **33**, 543-548 (2015).
- 396 15. Maruyama, T. et al. Increasing the efficiency of precise genome editing with CRISPR-  
397 Cas9 by inhibition of nonhomologous end joining. *Nat Biotechnol* **33**, 538-542 (2015).
- 398 16. Perucho, M., Hanahan, D. & Wigler, M. Genetic and physical linkage of exogenous  
399 sequences in transformed cells. *Cell* **22**, 309-317 (1980).
- 400 17. Folger, K.R., Wong, E.A., Wahl, G. & Capecchi, M.R. Patterns of integration of DNA  
401 microinjected into cultured mammalian cells: evidence for homologous recombination  
402 between injected plasmid DNA molecules. *Mol Cell Biol* **2**, 1372-1387 (1982).
- 403 18. Mello, C.C., Kramer, J.M., Stinchcomb, D. & Ambros, V. Efficient gene transfer in  
404 *C.elegans*: extrachromosomal maintenance and integration of transforming sequences.  
405 *EMBO J* **10**, 3959-3970 (1991).

- 406 19. Stuart, G.W., McMurray, J.V. & Westerfield, M. Replication, integration and stable germ-  
407 line transmission of foreign sequences injected into early zebrafish embryos. *Development*  
408 **103**, 403-412 (1988).
- 409 20. Lacy, E., Roberts, S., Evans, E.P., Burtenshaw, M.D. & Costantini, F.D. A foreign beta-  
410 globin gene in transgenic mice: integration at abnormal chromosomal positions and  
411 expression in inappropriate tissues. *Cell* **34**, 343-358 (1983).
- 412 21. Certo, M.T. et al. Tracking genome engineering outcome at individual DNA breakpoints.  
413 *Nat Methods* **8**, 671-676 (2011).
- 414 22. Iyer, S. et al. Efficient Homology-directed Repair with Circular ssDNA Donors. *bioRxiv*,  
415 864199 (2019).
- 416 23. Richardson, C.D., Ray, G.J., DeWitt, M.A., Curie, G.L. & Corn, J.E. Enhancing homology-  
417 directed genome editing by catalytically active and inactive CRISPR-Cas9 using  
418 asymmetric donor DNA. *Nat Biotechnol* **34**, 339-344 (2016).
- 419 24. Glaser, A., McColl, B. & Vadolas, J. GFP to BFP Conversion: A Versatile Assay for the  
420 Quantification of CRISPR/Cas9-mediated Genome Editing. *Mol Ther Nucleic Acids* **5**,  
421 e334 (2016).
- 422 25. Cho, S.W., Lee, J., Carroll, D., Kim, J.S. & Lee, J. Heritable gene knockout in  
423 *Caenorhabditis elegans* by direct injection of Cas9-sgRNA ribonucleoproteins. *Genetics*  
424 **195**, 1177-1180 (2013).
- 425 26. Paix, A., Folkmann, A., Rasoloson, D. & Seydoux, G. High Efficiency, Homology-  
426 Directed Genome Editing in *Caenorhabditis elegans* Using CRISPR-Cas9  
427 Ribonucleoprotein Complexes. *Genetics* **201**, 47-54 (2015).
- 428 27. Dokshin, G.A., Ghanta, K.S., Piscopo, K.M. & Mello, C.C. Robust Genome Editing with  
429 Short Single-Stranded and Long, Partially Single-Stranded DNA Donors in *Caenorhabditis*  
430 *elegans*. *Genetics* **210**, 781-787 (2018).
- 431 28. Ghanta, K.S. & Mello, C.C. Melting dsDNA Donor Molecules Greatly Improves Precision  
432 Genome Editing in *Caenorhabditis elegans*. *Genetics* **216**, 643-650 (2020).
- 433 29. Liu, P. et al. Enhanced Cas12a editing in mammalian cells and zebrafish. *Nucleic Acids*  
434 *Res* **47**, 4169-4180 (2019).
- 435 30. Tsai, S.Q. et al. GUIDE-seq enables genome-wide profiling of off-target cleavage by  
436 CRISPR-Cas nucleases. *Nat Biotechnol* **33**, 187-197 (2015).
- 437 31. Amrani, N. et al. NmeCas9 is an intrinsically high-fidelity genome-editing platform.  
438 *Genome Biol* **19**, 214 (2018).
- 439 32. Kan, Y., Ruis, B., Takasugi, T. & Hendrickson, E.A. Mechanisms of precise genome  
440 editing using oligonucleotide donors. *Genome Res* **27**, 1099-1111 (2017).
- 441 33. Quadros, R.M. et al. Easi-CRISPR: a robust method for one-step generation of mice  
442 carrying conditional and insertion alleles using long ssDNA donors and CRISPR  
443 ribonucleoproteins. *Genome Biol* **18**, 92 (2017).
- 444 34. Forbes, D.J., Kirschner, M.W. & Newport, J.W. Spontaneous formation of nucleus-like  
445 structures around bacteriophage DNA microinjected into *Xenopus* eggs. *Cell* **34**, 13-23  
446 (1983).
- 447 35. Stinchcomb, D.T., Shaw, J.E., Carr, S.H. & Hirsh, D. Extrachromosomal DNA  
448 transformation of *Caenorhabditis elegans*. *Mol Cell Biol* **5**, 3484-3496 (1985).
- 449 36. Costantini, F. & Lacy, E. Introduction of a rabbit beta-globin gene into the mouse germ  
450 line. *Nature* **294**, 92-94 (1981).

- 451 37. Lee, K. et al. Synthetically modified guide RNA and donor DNA are a versatile platform  
452 for CRISPR-Cas9 engineering. *Elife* **6** (2017).
- 453 38. Ghanta, K.S. et al. 5' Modifications Improve Potency and Efficacy of DNA Donors for  
454 Precision Genome Editing. *bioRxiv*, 354480 (2018).
- 455 39. Gutierrez-Triana, J.A. et al. Efficient single-copy HDR by 5' modified long dsDNA donors.  
456 *Elife* **7** (2018).
- 457 40. Yu, Y. et al. An efficient gene knock-in strategy using 5'-modified double-stranded DNA  
458 donors with short homology arms. *Nat Chem Biol* **16**, 387-390 (2020).
- 459 41. Canaj, H. et al. Deep profiling reveals substantial heterogeneity of integration outcomes in  
460 CRISPR knock-in experiments. *bioRxiv*, 841098 (2019).
- 461 42. Gutschner, T., Haemmerle, M., Genovese, G., Draetta, G.F. & Chin, L. Post-translational  
462 Regulation of Cas9 during G1 Enhances Homology-Directed Repair. *Cell Rep* **14**, 1555-  
463 1566 (2016).
- 464 43. Yang, D. et al. Enrichment of G2/M cell cycle phase in human pluripotent stem cells  
465 enhances HDR-mediated gene repair with customizable endonucleases. *Sci Rep* **6**, 21264  
466 (2016).
- 467 44. Ling, X. et al. Improving the efficiency of precise genome editing with site-specific Cas9-  
468 oligonucleotide conjugates. *Sci Adv* **6**, eaaz0051 (2020).
- 469

470

471 **Figure Legends**

472 **Figure 1.** 5' end-modified donors promote HDR in Traffic-Light Reporter (TLR) cells. (A)  
473 Schematic showing the TLR assay to quantify HDR efficiencies using unmodified or end-modified  
474 dsDNA donors. Editing efficiencies plotted as percentage of (B) GFP<sup>+</sup> (HDR) and (C) mCherry<sup>+</sup>  
475 (NHEJ) HEK293T TLR cells at different amounts of unmodified, 2'OMe-RNA::TEG-modified  
476 dsDNA donors. Editing efficiencies plotted as percentage of (D) GFP<sup>+</sup> (HDR) and (E) mCherry<sup>+</sup>  
477 (NHEJ) HEK293T TLR cells at 1.2 pmol of dsDNA donors indicated. Percentage of GFP<sup>+</sup> cells  
478 obtained with dsDNA donors modified with various lengths of ethylene glycol (F) and with  
479 modifications to only one end or both 5' ends of the donor. TS- target strand, NTS- non-target  
480 strand (G). Mean  $\pm$  s.d for at least three independent replicates are plotted; two replicates for TEG-  
481 donor in panel G.

482

483 **Figure 2.** End-modified donors promote HDR at endogenous loci in mammalian cell cultures. (A)  
484 schematic representation of the 5' modified donor design for eGFP insertion and FACS sorting is  
485 shown. Efficacy of eGFP integration at (B) *TOMM20* and (C) *GAPDH* (D) *Sec61B* loci in  
486 HEK293T cells using unmodified, TEG or 2'OMe-RNA::TEG-modified donors are plotted as  
487 percentage of GFP<sup>+</sup> cells. Efficacy of eGFP integration at the (E) *TOMM20* locus in HFF (747 bp  
488 knock-in with ~1kb homology arms) and (F) *Gapdh* locus in CHO (1635 bp knock-in with ~800  
489 bp homology arms) cells using dsDNA (500 ng) donors with and without 2'OMe-RNA::TEG  
490 modifications at the 5' ends. (G) Schematic representation of the dsDNA donor design used for  
491 quantification with deep sequencing is shown. (H) Illumina sequencing reads with precise knock-  
492 in are plotted for dsDNA donors with 90bp homology arms at *EMX1* locus in HEK293T cells.  
493 Mean  $\pm$  s.d for at least three independent replicates are plotted. P-values were calculated using

494 one-way ANOVA and in all cases end-modified donors were compared to unmodified donor  
495 unless indicated otherwise (Tukey's multiple comparisons test; \*\*\*\*P < 0.0001; \*\*\*P < 0.001;  
496 \*\*P < 0.01; \*P < 0.05; ns- not significant).

497

498 **Figure 3.** End-modifications increase potency of ssODN donors (A) Editing efficacy plotted as  
499 percentage of GFP+ (precise) HEK293T TLR cells at different amounts of unmodified and 2'OMe-  
500 RNA::TEG-modified long ssDNA donors (800 nt). (B) Editing efficacy of GFP-to-BFP reporter  
501 conversion in K562 cells using different amounts of unmodified and 2'OMe-RNA::TEG-modified  
502 66 nt ssODN donors plotted as percentage of BFP+ cells (HDR). (C). Editing efficacy of GFP-to-  
503 BFP conversion in K562 cells using 0.5 pmol of ssODN donors modified at the 5' end alone, the  
504 3' end alone, or at both the 5' and 3' ends, with phosphorothioate (PS), TEG, 2'OMe-RNA, or  
505 2'OMe-RNA::TEG, plotted as percentage of BFP+ cells (precise). Complete figure of panel C is  
506 shown, along with other modifications, in Figure. S4. Mean  $\pm$  s.d for at least three independent  
507 replicates are plotted. P-values were calculated using one-way ANOVA and in all cases end-  
508 modified donors were compared to unmodified donor unless indicated otherwise (Tukey's multiple  
509 comparisons test; \*\*\*\*P < 0.0001; \*\*\*P < 0.001; \*\*P < 0.01; \*P < 0.05; ns- not significant).

510

511 **Figure 4.** Modified donors promote precise editing in *C. elegans*. (A) Schematic showing end-  
512 modified dsDNA donors (25ng/ $\mu$ l) with short (~35bp) homology arms to insert *gfp* tag. (B)  
513 Number of GFP expressing animals among entire F1 brood of two representative P0 animals for  
514 each donor type are plotted for *eft-3p* reporter locus. Fraction of F1 animals expressing GFP among  
515 (C) Roller and (D) non-Roller cohorts are plotted as percentage for *eft-3p* locus. Similarly, (E)  
516 number of GFP expressing animals among two representative broods, fraction of F1 animals

517 expressing GFP among (F) Roller and (G) non-Roller cohorts are plotted for *csr-1* locus. Open  
518 bars (Rollers) and closed bars represent (non-Rollers) median. Number of GFP expressing animals  
519 among total number of animals scored per cohort are shown above the bars.  $n \geq 4$  broods for each  
520 donor condition. P-values were calculated using one-way ANOVA and in all cases end-modified  
521 donors were compared to unmodified donors (Tukey's multiple comparisons test; \*\*\*\*P < 0.0001;  
522 \*\*\*P < 0.001; \*\*P < 0.01; \*P < 0.05; ns- not significant).

523

524 **Figure 5.** 2'-OMe-RNA-TEG donors promote precise editing in vertebrate zygotes. (A)  
525 unmodified, TEG and 2'-OMe-RNA-TEG modified dsDNA donors were injected into zebrafish  
526 zygotes. dsDNA donor design to knock-in Avi-tag is shown on the top and the fraction of Illumina  
527 reads containing precise knock-in are plotted as percentages. Mean  $\pm$  s.d for at least three  
528 independent replicates (two for unmodified donors) are plotted (B). Design of the dsDNA donors  
529 injected into mouse zygotes to precisely convert the coat color of albino mice (*Tyr<sup>C</sup>*) to pigmented  
530 (*Tyr<sup>C-Cor</sup>*) by editing C to G (underscored) along with six silent mutations (in red) is shown.  
531 Percentages of F0 founder mice with black coat are shown. (C) percentages of animals among  
532 HDR positive F0s that have uniform dark coat or mosaic coat color are plotted for unmodified and  
533 5' modified donors. (D) Representative pictures of 10 days old F0 mice with pigmented (HDR) or  
534 white (wt or indel) coat color are shown. One mosaic mouse (third from left) can be seen among  
535 the pups obtained with end-modified donor. (E) Donor design to knock-in V5 tag at the C-terminus  
536 of Sox2 is shown on the top. Percentage of founder animals containing perfect V5 insertion at Sox2  
537 locus are shown for each donor type. HA: Homology Arms. P-values were calculated using one-  
538 way ANOVA (Tukey's multiple comparisons test; \*\*\*\*P < 0.0001; \*\*\*P < 0.001; \*\*P < 0.01;  
539 \*P < 0.05; ns- not significant).

540 **Figure 6.** End-modifications suppress formation of donor concatemers. (A) Model for mechanisms  
541 of concatemer formation is shown. (B) Southern blot of unmodified and TEG modified dsDNA  
542 (566bp) nucleofected into HEK293T cells and collected at indicated time points.  
543 Concatemerization of unmodified DNA is visualized as ladders; 566bp DNA and 13kb long DNA  
544 are used as size markers (m). Number of Guide-seq reads with unmodified and TEG modified  
545 short dsDNA (34bp) integration for, (C) whole genome and (D) on-target (*ARHGEF9*) and six  
546 previously validated off-target loci are plotted. Data from two biological replicates is shown.  
547  
548



## Figure 1

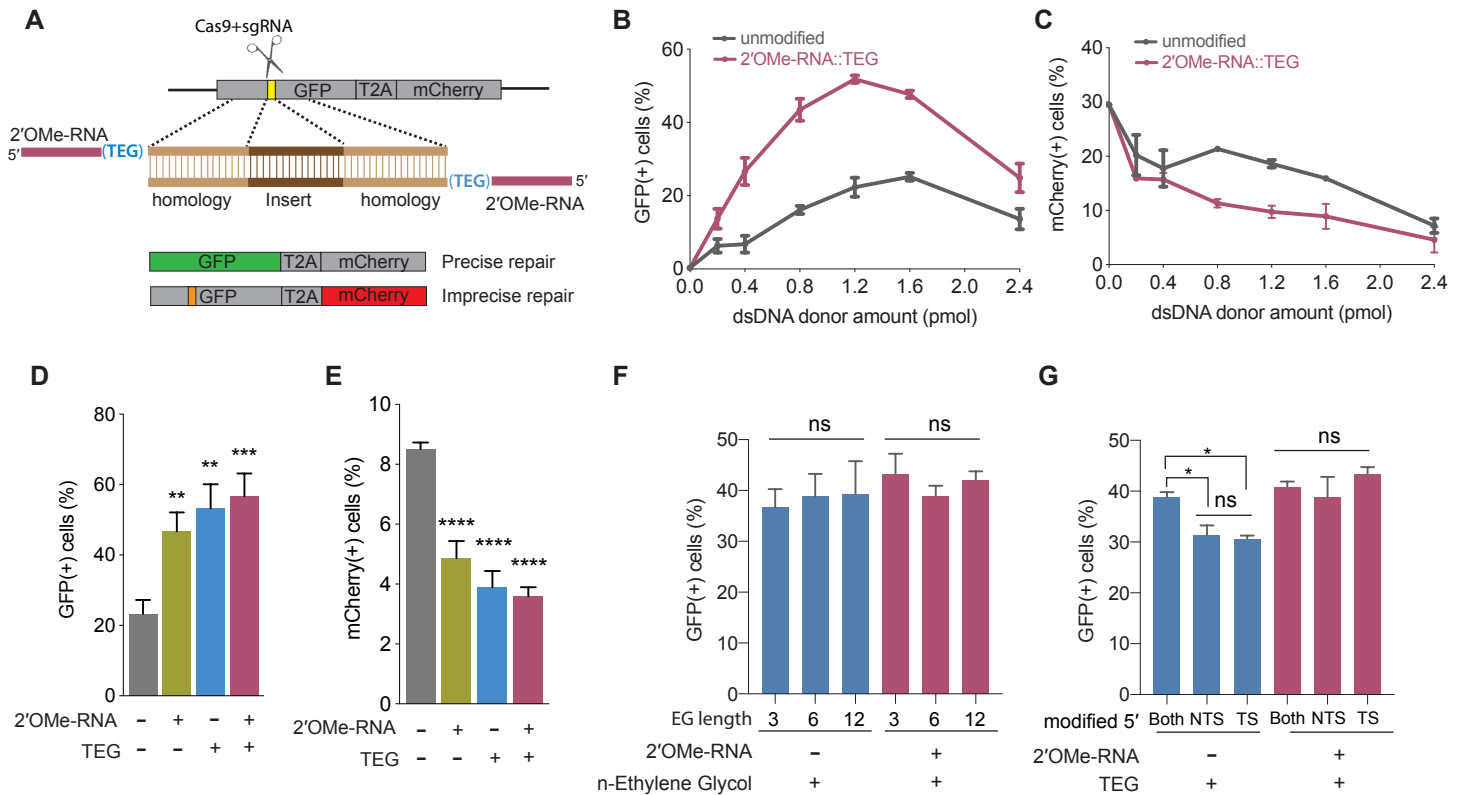

**Figure 1.** 5' end-modified donors promote HDR in Traffic-Light Reporter (TLR) cells. (A) Schematic showing the TLR assay to quantify HDR efficiencies using unmodified or end-modified dsDNA donors. Editing efficiencies plotted as percentage of (B) GFP+ (HDR) and (C) mCherry+ (NHEJ) HEK293T TLR cells at different amounts of unmodified, 2'OMe-RNA::TEG-modified dsDNA donors. Editing efficiencies plotted as percentage of (D) GFP+ (HDR) and (E) mCherry+ (NHEJ) HEK293T TLR cells at 1.2 pmol of dsDNA donors indicated. Percentage of GFP+ cells obtained with dsDNA donors modified with various lengths of ethylene glycol (F) and with modifications to only one end or both 5' ends of the donor. TS- target strand, NTS- non-target strand (G). Mean  $\pm$  s.d for at least three independent replicates are plotted; two replicates for TEG-donor in panel G

## Figure 2

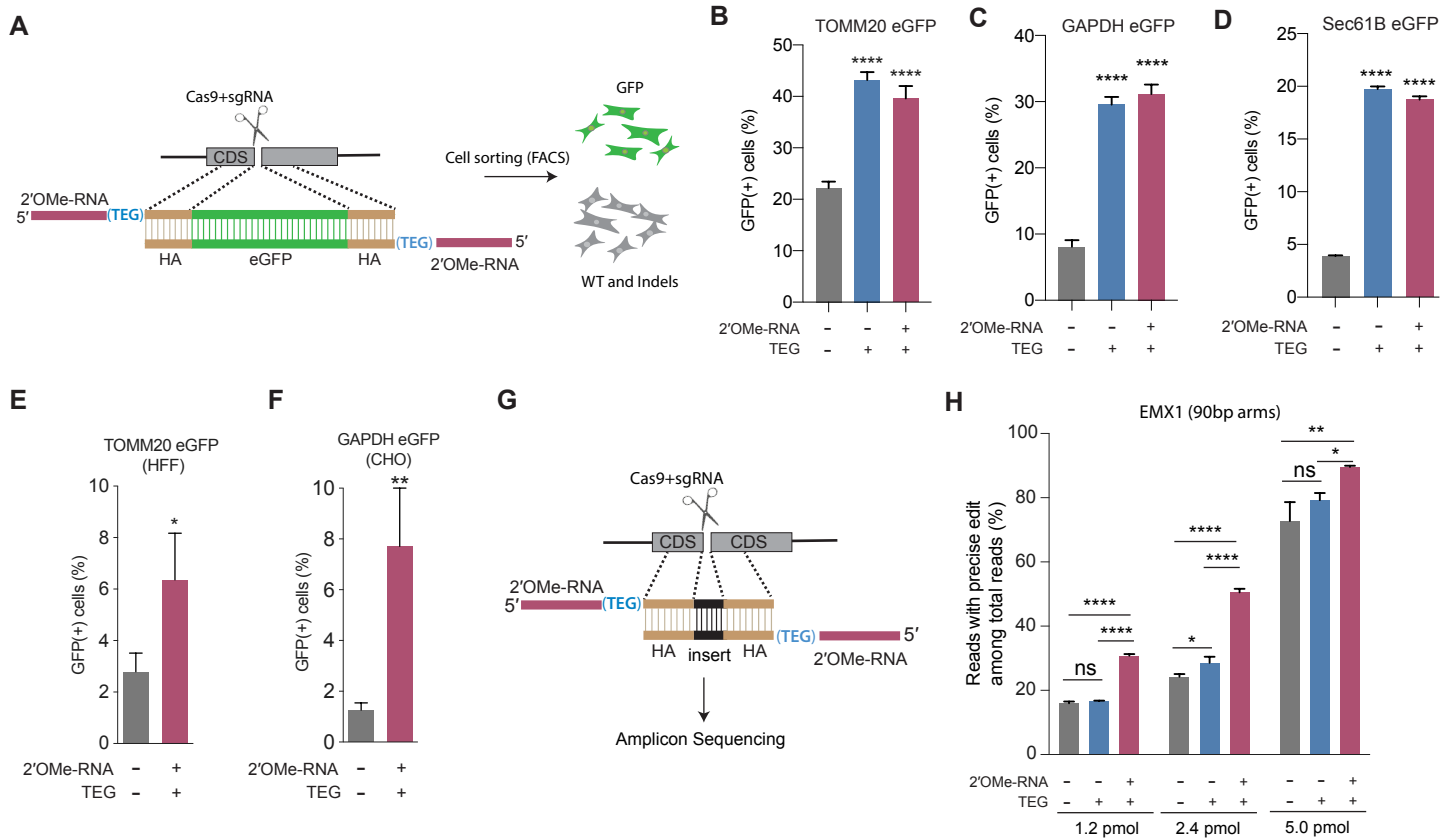

**Figure 2.** End-modified donors promote HDR at endogenous loci in mammalian cell cultures. (A) schematic representation of the 5' modified donor design for eGFP insertion and FACS sorting is shown. Efficacy of eGFP integration at (B) TOMM20 and (C) GAPDH (D) Sec61B loci in HEK293T cells using unmodified, TEG or 2'OMe-RNA::TEG-modified donors are plotted as percentage of GFP+ cells. Efficacy of eGFP integration at the (E) TOMM20 locus in HFF (747 bp knock-in with ~1kb homology arms) and (F) Gapdh locus in CHO (1635 bp knock-in with ~800 bp homology arms) cells using dsDNA (500 ng) donors with and without 2'OMe-RNA::TEG modifications at the 5' ends. (G) Schematic representation of the dsDNA donor design used for quantification with deep sequencing is shown. (H) Illumina sequencing reads with precise knock-in are plotted for dsDNA donors with 90bp homology arms at EMX1 locus in HEK293T cells. Mean  $\pm$  s.d for at least three independent replicates are plotted. P-values were calculated using one-way ANOVA and in all cases end-modified donors were compared to unmodified donor unless indicated otherwise (Tukey's multiple comparisons test; \*\*\*\*P < 0.0001; \*\*\*P < 0.001; \*\*P < 0.01; \*P < 0.05; ns- not significant).

### Figure 3

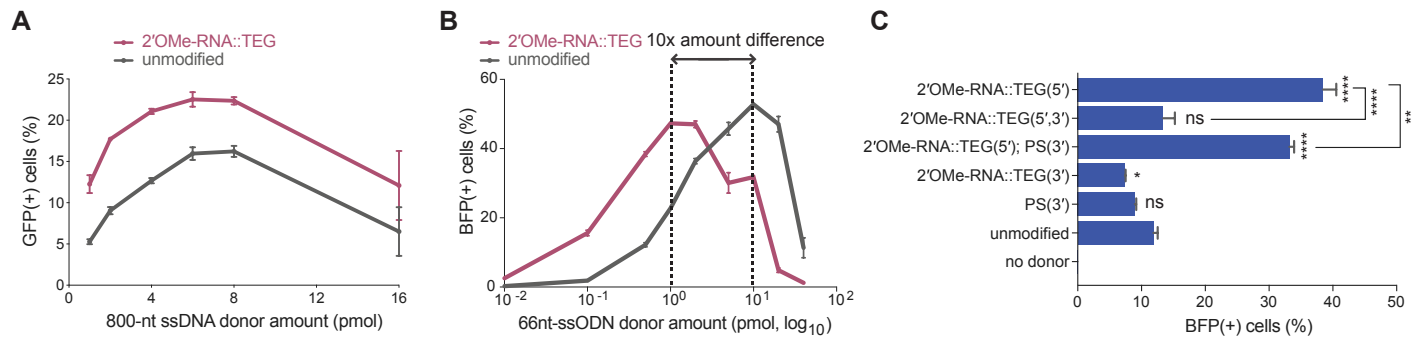

**Figure 3.** End-modifications increase potency of ssODN donors (A) Editing efficacy plotted as percentage of GFP+ (precise) HEK293T TLR cells at different amounts of unmodified and 2'OMe-RNA::TEG-modified long ssDNA donors (800 nt). (B) Editing efficacy of GFP-to-BFP reporter conversion in K562 cells using different amounts of unmodified and 2'OMe-RNA::TEG-modified 66 nt ssODN donors plotted as percentage of BFP+ cells (HDR). (C). Editing efficacy of GFP-to-BFP conversion in K562 cells using 0.5 pmol of ssODN donors modified at the 5' end alone, the 3' end alone, or at both the 5' and 3' ends, with phosphorothioate (PS), TEG, 2'OMe-RNA, or 2'OMe-RNA::TEG, plotted as percentage of BFP+ cells (precise). Complete figure of panel C is shown, along with other modifications, in Figure. S4. Mean  $\pm$  s.d for at least three independent replicates are plotted. P-values were calculated using one-way ANOVA and in all cases end-modified donors were compared to unmodified donor unless indicated otherwise (Tukey's multiple comparisons test; \*\*\*\*P < 0.0001; \*\*\*P < 0.001; \*\*P < 0.01; \*P < 0.05; ns- not significant).

## Figure 4

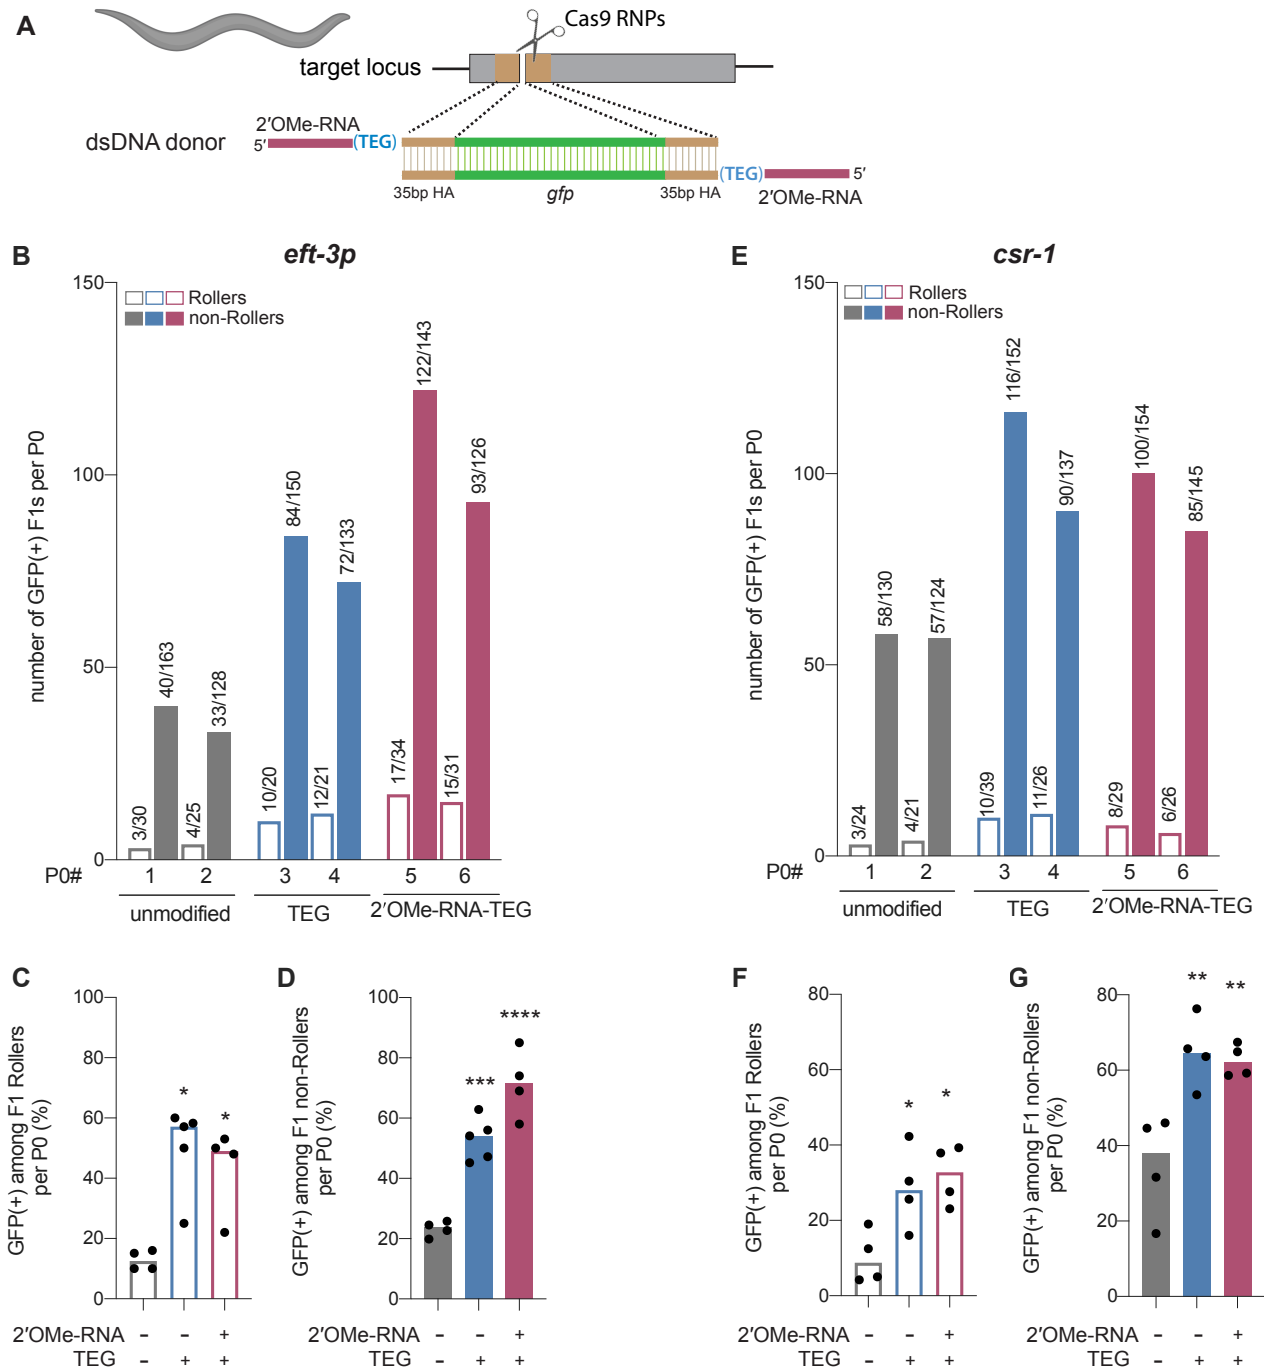

**Figure 4.** Modified donors promote precise editing in *C. elegans*. (A) Schematic showing end-modified dsDNA donors (25ng/ $\mu$ l) with short (~35bp) homology arms to insert *gfp* tag. (B) Number of GFP expressing animals among entire F1 brood of two representative P0 animals for each donor type are plotted for *eft-3p* reporter locus. Fraction of F1 animals expressing GFP among (C) Roller and (D) non-Roller cohorts are plotted as percentage for *eft-3p* locus. Similarly, (E) number of GFP expressing animals among two representative broods, fraction of F1 animals expressing GFP among (F) Roller and (G) non-Roller cohorts are plotted for *csr-1* locus. Open bars (Rollers) and closed bars represent (non-Rollers) median. Number of GFP expressing animals among total number of animals scored per cohort are shown above the bars.  $n \geq 4$  broods for each donor condition. P-values were calculated using one-way ANOVA and in all cases end-modified donors were compared to unmodified donors (Tukey's multiple comparisons test; \*\*\*\* $P < 0.0001$ ; \*\*\* $P < 0.001$ ; \*\* $P < 0.01$ ; \* $P < 0.05$ ; ns- not significant).

## Figure 5

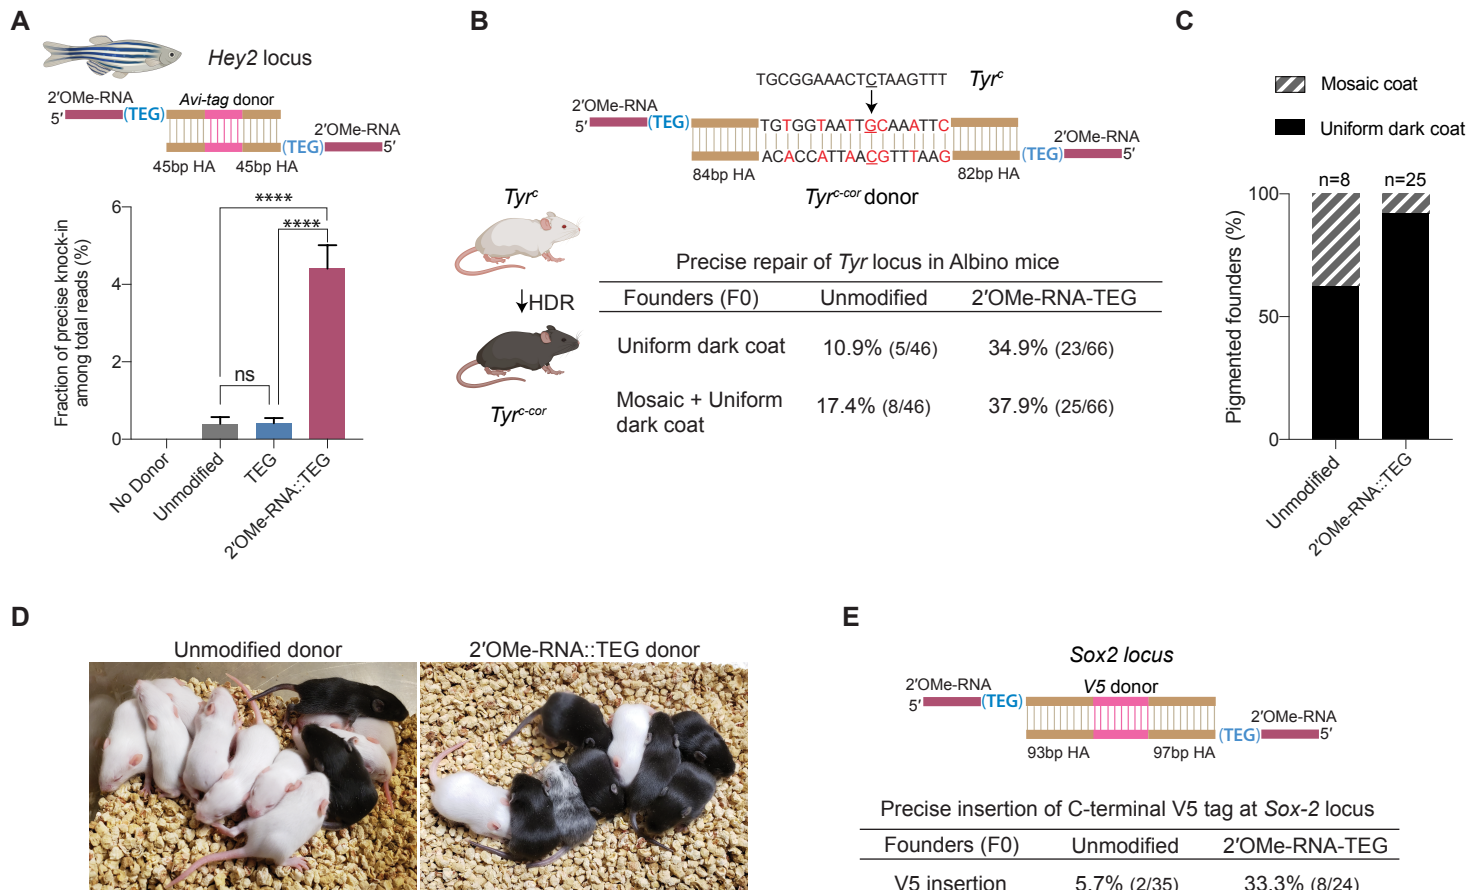

**Figure 5.** 2'-Ome-RNA-TEG donors promote precise editing in vertebrate zygotes. (A) unmodified, TEG and 2'-Ome-RNA-TEG modified dsDNA donors were injected into zebrafish zygotes. dsDNA donor design to knock-in Avi-tag is shown on the top and the fraction of Illumina reads containing precise knock-in are plotted as percentages. Mean  $\pm$  s.d for at least three independent replicates (two for unmodified donors) are plotted (B). Design of the dsDNA donors injected into mouse zygotes to precisely convert the coat color of albino mice (*Tyr<sup>c</sup>*) to pigmented (*Tyr<sup>c-corr</sup>*) by editing C to G (underscored) along with six silent mutations (in red) is shown. Percentages of F0 founder mice with black coat are shown. (C) percentages of animals among HDR positive F0s that have uniform dark coat or mosaic coat color are plotted for unmodified and 5' modified donors. (D) Representative pictures of 10 days old F0 mice with pigmented (HDR) or white (wt or indel) coat color are shown. One mosaic mouse (third from left) can be seen among the pups obtained with end-modified donor. (E) Donor design to knock-in V5 tag at the C-terminus of Sox2 is shown on the top. Percentage of founder animals containing perfect V5 insertion at Sox2 locus are shown for each donor type. HA: Homology Arms. P-values were calculated using one-way ANOVA (Tukey's multiple comparisons test; \*\*\*\*P < 0.0001; \*\*\*P < 0.001; \*\*P < 0.01; \*P < 0.05; ns- not significant).

## Figure 6

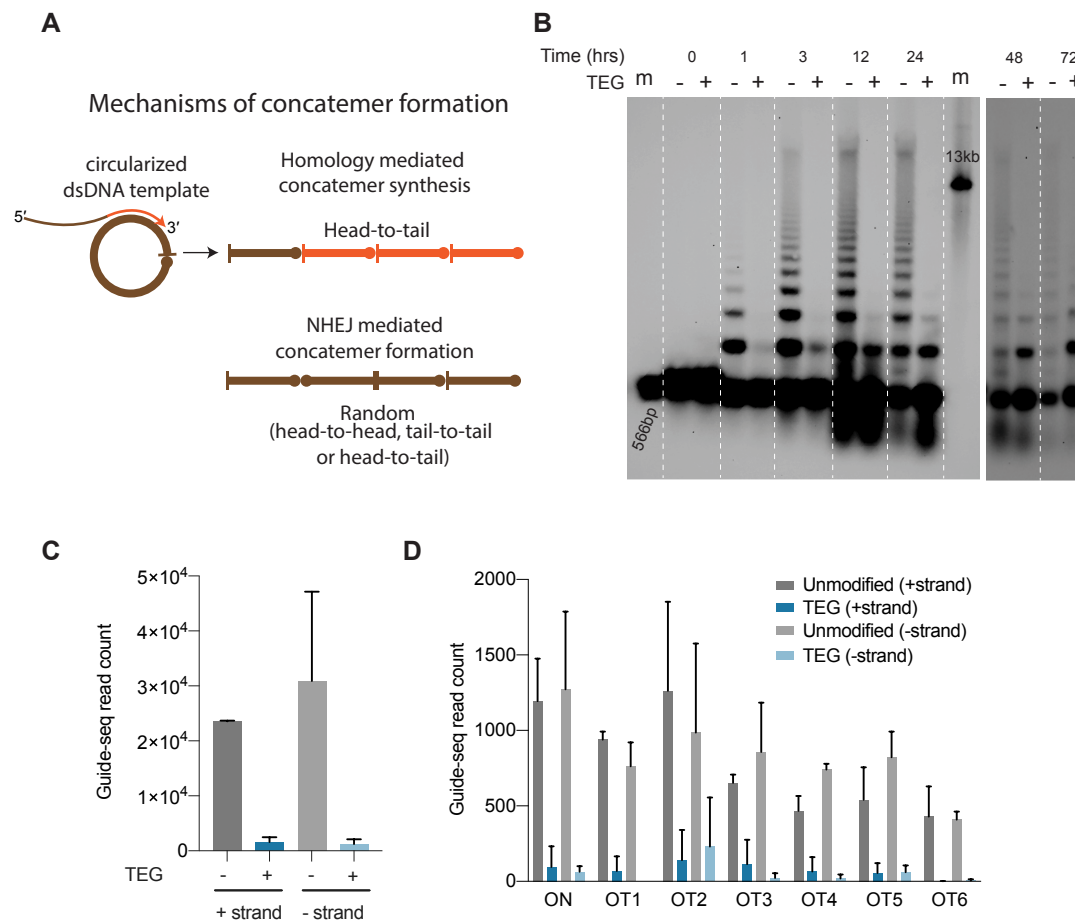

**Figure 6.** End-modifications suppress formation of donor concatemers. (A) Model for mechanisms of concatemer formation is shown. (B) Southern blot of unmodified and TEG modified dsDNA (566bp) nucleofected into HEK293T cells and collected at indicated time points. Concatemerization of unmodified DNA is visualized as ladders; 566bp DNA and 13kb long DNA are used as size markers (m). Number of Guide-seq reads with unmodified and TEG modified short dsDNA (34bp) integration for, (C) whole genome and (D) on-target (*ARHGEF9*) and six previously validated off-target(OT) loci are plotted; data from two biological replicates is shown.

Supplementary Materials for  
**5' Modifications Improve Potency and Efficacy of DNA Donors for Precision  
Genome Editing**

This PDF file includes:

Supplementary Figures. 1 to 9

Materials and Methods

## Figure S1

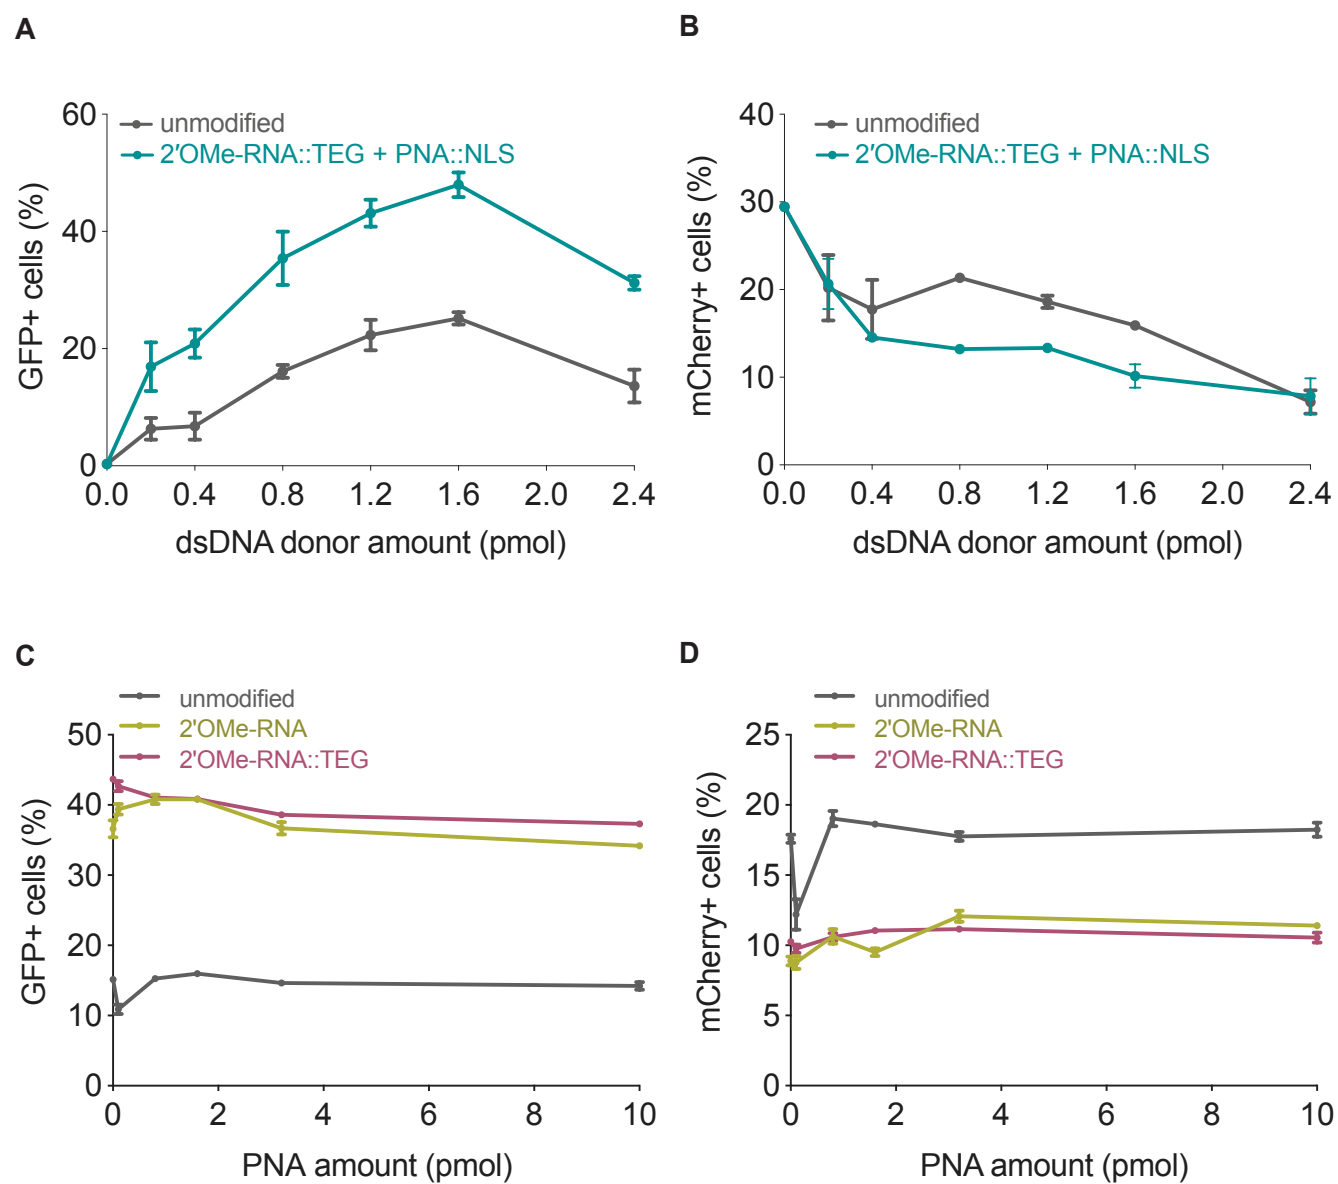

**Figure S1:** 2'OMe-RNA at 5' ends of donors promote HDR in mammalian cells. Editing efficacy plotted as percentage of (A) GFP+ (HDR) and (B) mCherry+ (NHEJ) HEK293T TLR cells at different amounts of unmodified, 2'OMe-RNA::TEG-modified and PNA::NLS-annealed dsDNA donors. Same unmodified controls are used in Figure 1 B and C. Addition of PNA (without NLS) to unmodified or end-modified donors does not further improve HDR efficiency in mammalian cells. 0.8 pmol of each type of donor was annealed to PNA (0.1 to 10 pmol). Editing efficiency was plotted as percentage of (C) GFP+ (HDR) cells and (D) mCherry+ (NHEJ) cells. Percentages were calculated by sorting the cells through flow cytometry (see Methods)



## Figure S2

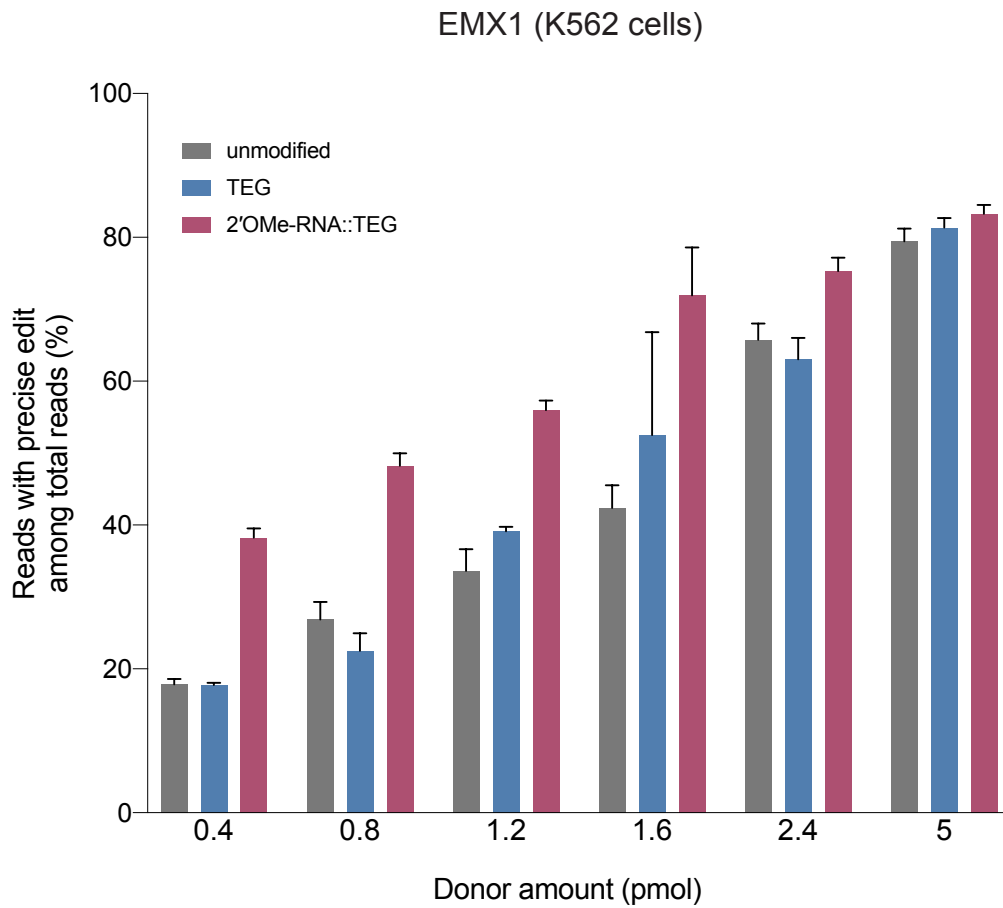

**Figure S2.** RNA::TEG donors with short (90bp) homology arms are more potent than unmodified donors at *EMX1* locus. Fraction of precise reads is plotted as percentage of total Illumina reads obtained at various amounts of dsDNA donors into K562 cells. Cas9 RNPs and dsDNA donors were nucleofected into K562 cells and harvested after 3 days.

### Figure S3

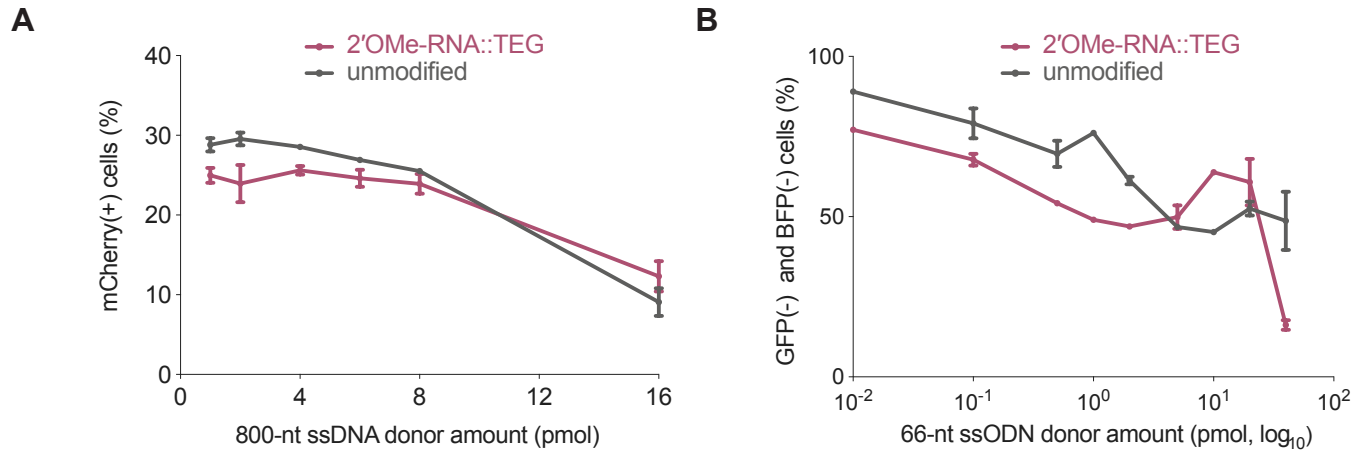

**Figure S3.** 2'OMe-RNA::TEG modification of single-stranded DNA donors results in reduced imprecise editing. (A) Imprecise editing efficiency plotted as percentage of mCherry(+)HEK293T TLR cells at different amounts of unmodified or TEG::2'OMe-RNA-modified ssDNA donor. Fraction of cells expressing GFP is plotted in Figure. 3A. (B) Imprecise editing plotted as percentage of GFP(-) and BFP(-) cells in GFP-to-BFP reporter K562 cells using different amounts of unmodified and TEG::2'OMe-RNA-modified ssODN donors. Fraction of cells expressing BFP is plotted in Figure. 3B

## Figure S4

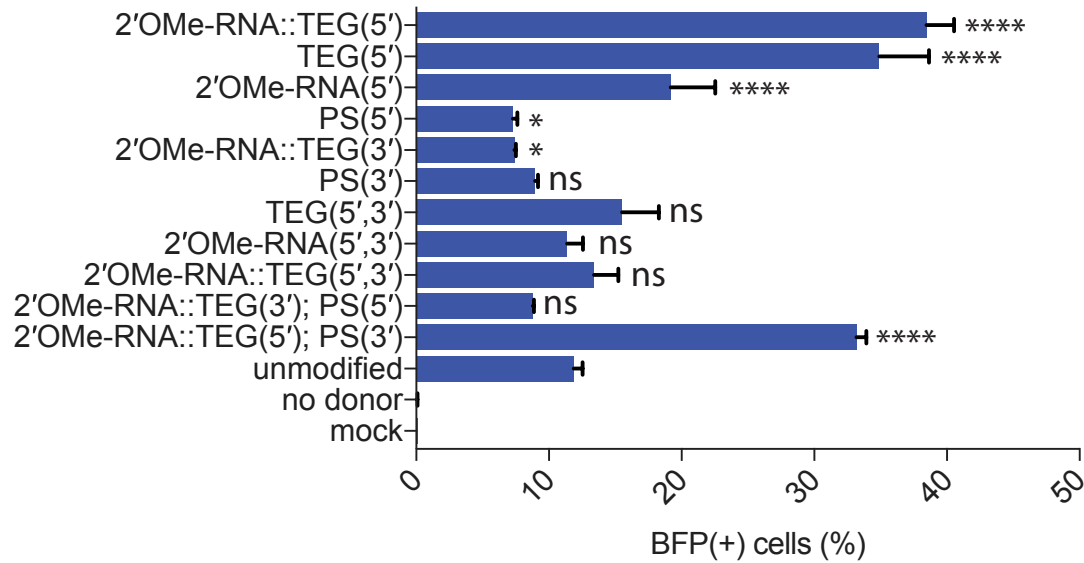

**Figure S4.** Effects of terminal and non-terminal modifications of ssODN donors on HDR efficacy. Editing efficacy of GFP-to-BFP conversion in K562 cells using 0.5 pmol of ssODN donors modified at the 5' end alone, the 3' end alone, or at both the 5' and 3' ends, with phosphorothioate (PS), TEG, 2'OMe-RNA, or 2'OMe-RNA::TEG, plotted as percentage of BFP(+) cells (HDR). This figure consists of the data shown in Figure. 3C along with other controls and modifications to the donors. Note that the PS modification is at the 5' or 3' internal linkages while TEG modifications are appended to the 5' or 3' terminus. All data points represent a mean of at least three independent replicates and all error bars represent standard deviation. P-values were calculated using one-way ANOVA and in all cases end-modified donors were compared to the unmodified donor (Tukey's multiple comparisons test; \*\*\*\*P < 0.0001; \*\*\*P < 0.001; \*\*P < 0.01; \*P < 0.05; ns- not significant).

## Figure S5

A

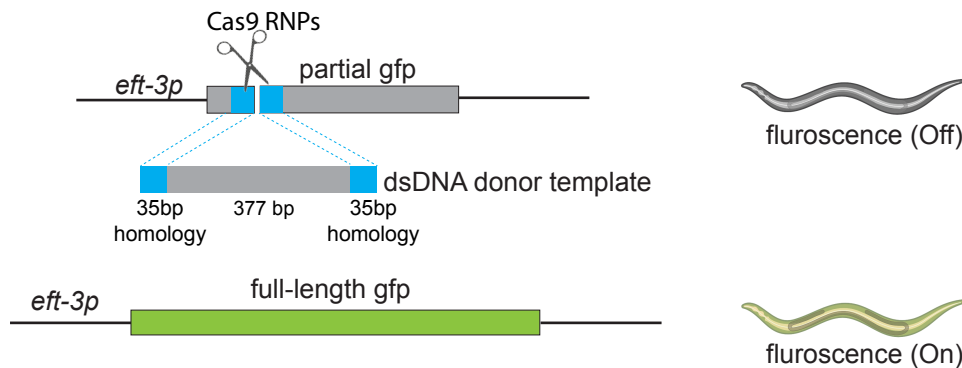

B

| dsDNA donor type | GFP(+) F1s cloned | F2 transmission (%) |
|------------------|-------------------|---------------------|
| unmodified       | 40                | 40 (100)            |
| TEG              | 39                | 39 (100)            |
| 2'OMe-RNA-TEG    | 36                | 36 (100)            |

**Figure S5.** Precise insertions are germline transmitted in *C. elegans*. (A) Schematic representation of the *eft3p-gfp* (partial) locus edited with dsDNA donors with or without end-modifications in *C. elegans*. Precisely edited animals express GFP signal ubiquitously. (B) GFP-positive F1 animals were cloned and their progeny (F2s) were scored for GFP expression. Number of F1s that produced GFP expressing F2 in a mendelian fashion are shown under F2 transmission column.

## Figure S6

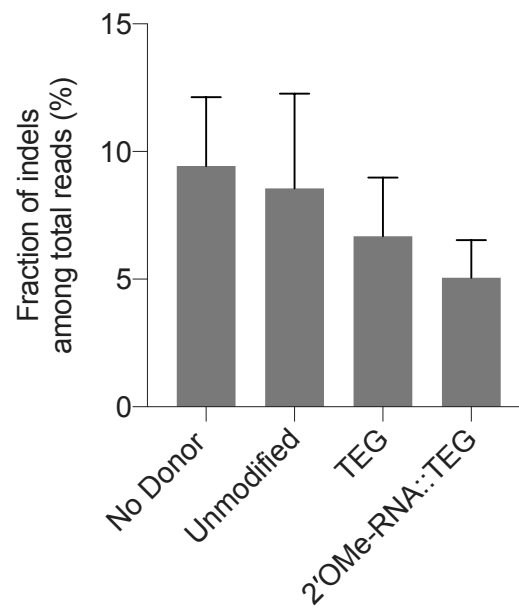

**Figure S6** : Indel efficiencies in zebrafish zygotes. (A) Fraction of reads with indels among total reads obtained in experiments with either no donor, unmodified or end-modified donors are plotted as percentage. Precise repair (HDR) efficiencies are shown in Figure 5A.

## Figure S7

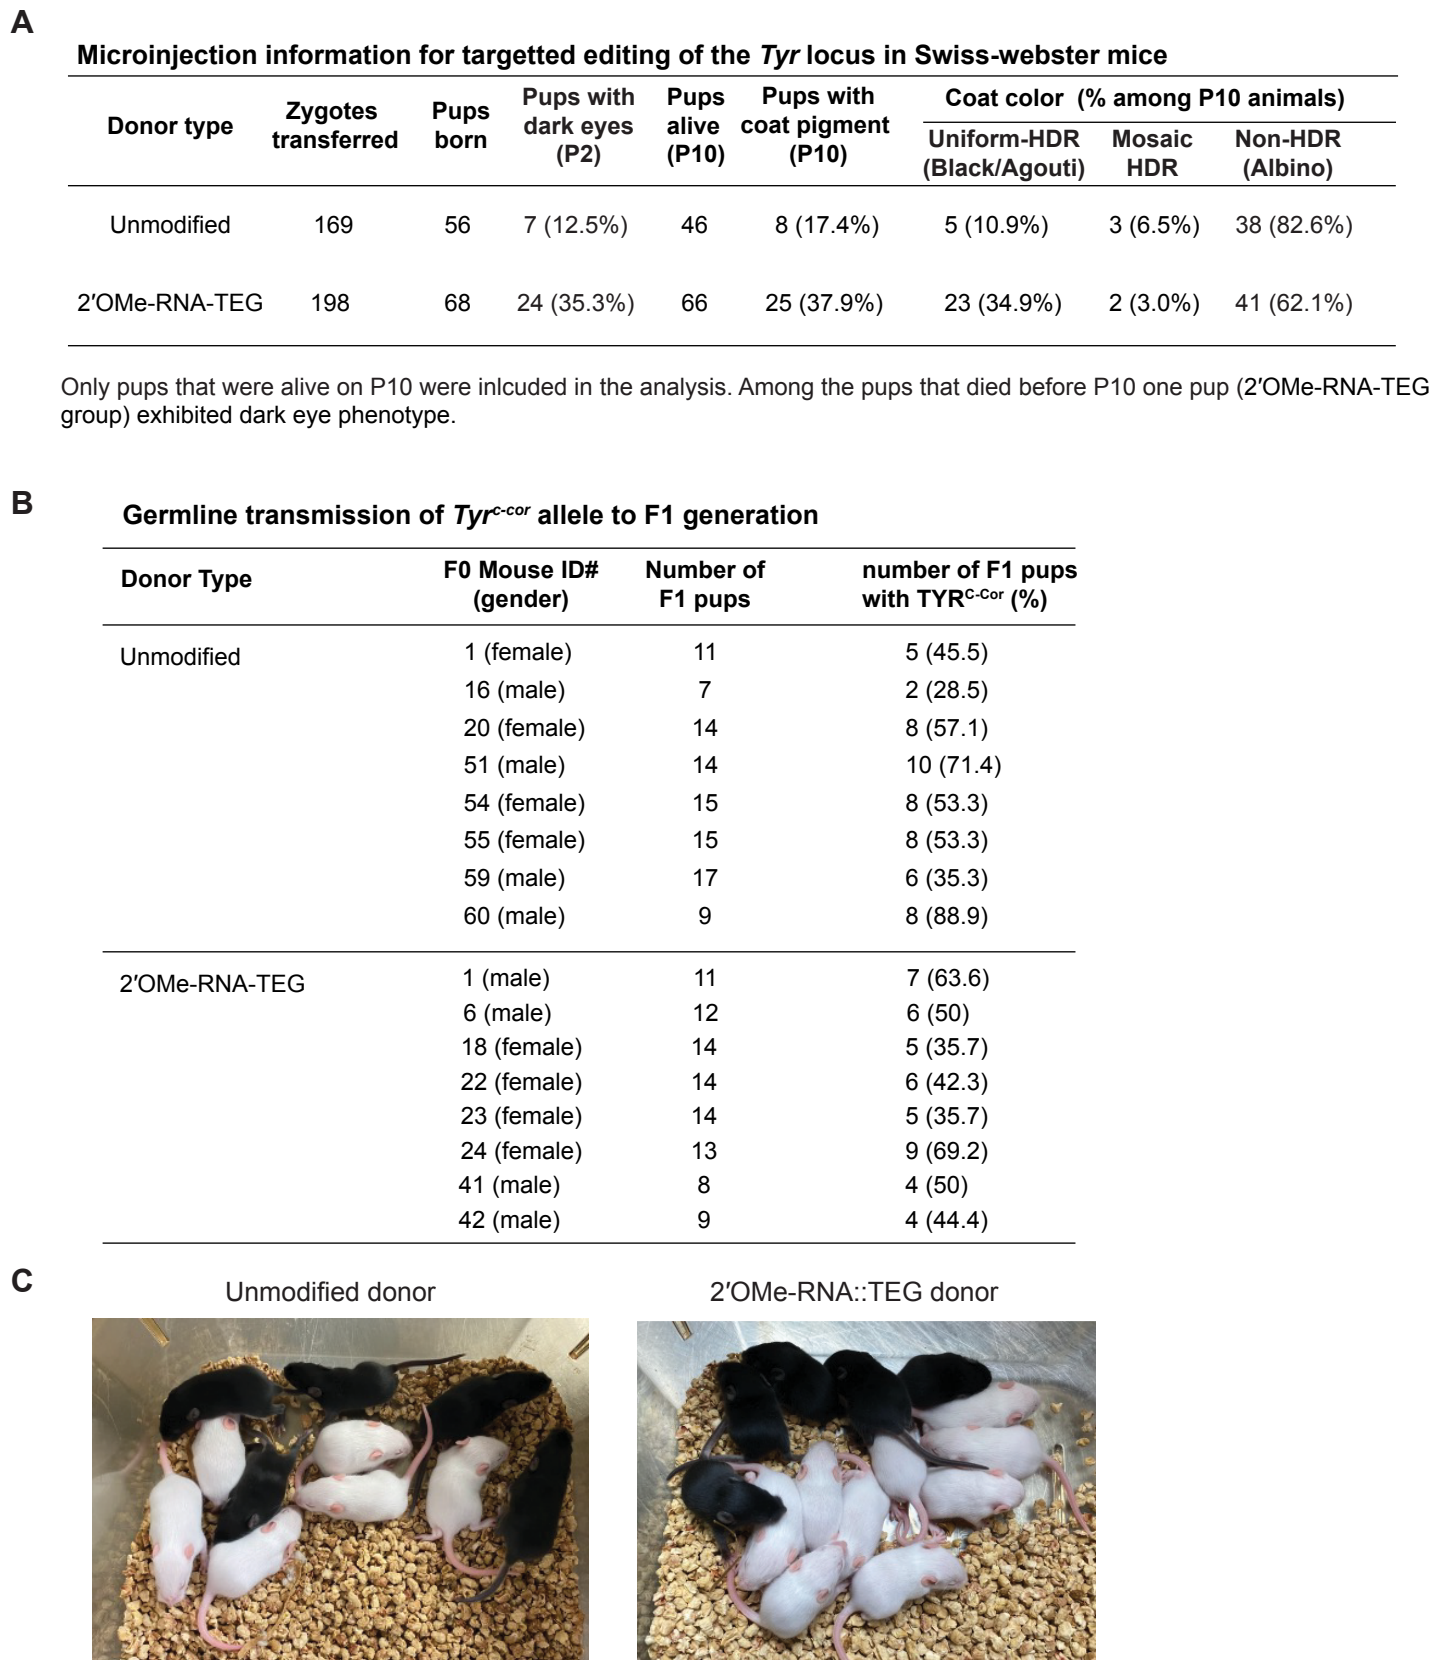

**Figure S7.** 5' modified donors improve targetted editing efficiency at the *Tyr* locus in Albino mice. (A) Microinjection information and HDR efficiencies obtained for unmodified and 2'OMe-RNA::TEG modified donors. (B) Germline transmission of the edited *Tyr<sup>c-cor</sup>* allele was confirmed by crossing some of the pigmented F0 mice to Swiss webster mice (*Tyr<sup>c</sup>*) and phenotyping their F1 progeny (C) Representative images of F1 litters obtained from crosses for germline transmission tests.

## Figure S8

**A**

### Microinjection information for V5 tag insertion at the Sox2 locus

| Donor type    | Zygotes transferred | Pups born | Pups analyzed | HDR (% among analyzed) |
|---------------|---------------------|-----------|---------------|------------------------|
| Unmodified    | 214                 | 36        | 35            | 2 (5.7%)               |
| 2'OMe-RNA-TEG | 209                 | 27        | 24            | 8 (33.3%)              |

1 pup from the unmodified donor group and 3 pups from 2'OMe-RNA-TEG donor group died at P3 and were not included in the analysis).

**B**

### Germline transmission of Sox2::V5 to F1 generation

| Donor Type    | F0 Mouse ID# (gender) | number of F1 pups | number of F1 pups with Sox2::V5 (%) |
|---------------|-----------------------|-------------------|-------------------------------------|
| Unmodified    | 6 (male)              | 18                | 14 (77.8)                           |
| 2'OMe-RNA-TEG | 10 (male)             | 10                | 5 (50)                              |
|               | 11 (male)             | 10                | 3 (30)                              |
|               | 12 (female)           | 6                 | 4 (66.7)                            |
|               | 16 (female)           | 1                 | 1 (100)                             |
|               | 17 (female)           | 5                 | 3 (60)                              |
|               | 26 (male)             | 6                 | 4 (66.7)                            |

**C**

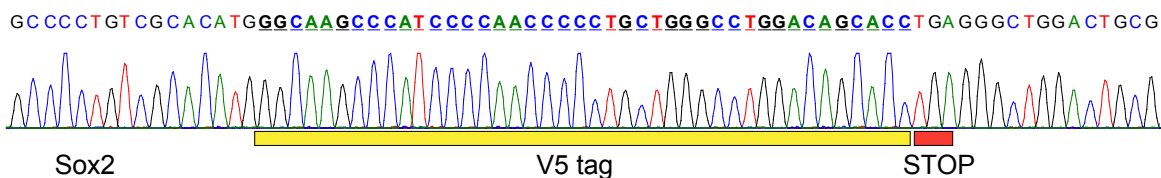

**Figure S8.** 5' modified donors improve targeted editing efficiency at the Sox2 locus in mouse zygotes. (A) Microinjection information and HDR efficiencies obtained using unmodified and 2'OMe-RNA::TEG modified donors are shown. (B) Germline transmission rates of the Sox2::V5 allele was confirmed by crossing the HDR positive F0 mice with WT mice and genotyping the F1 pups. (C). Sanger sequencing trace of Sox2::V5 allele in F1 mice.

## Figure S9

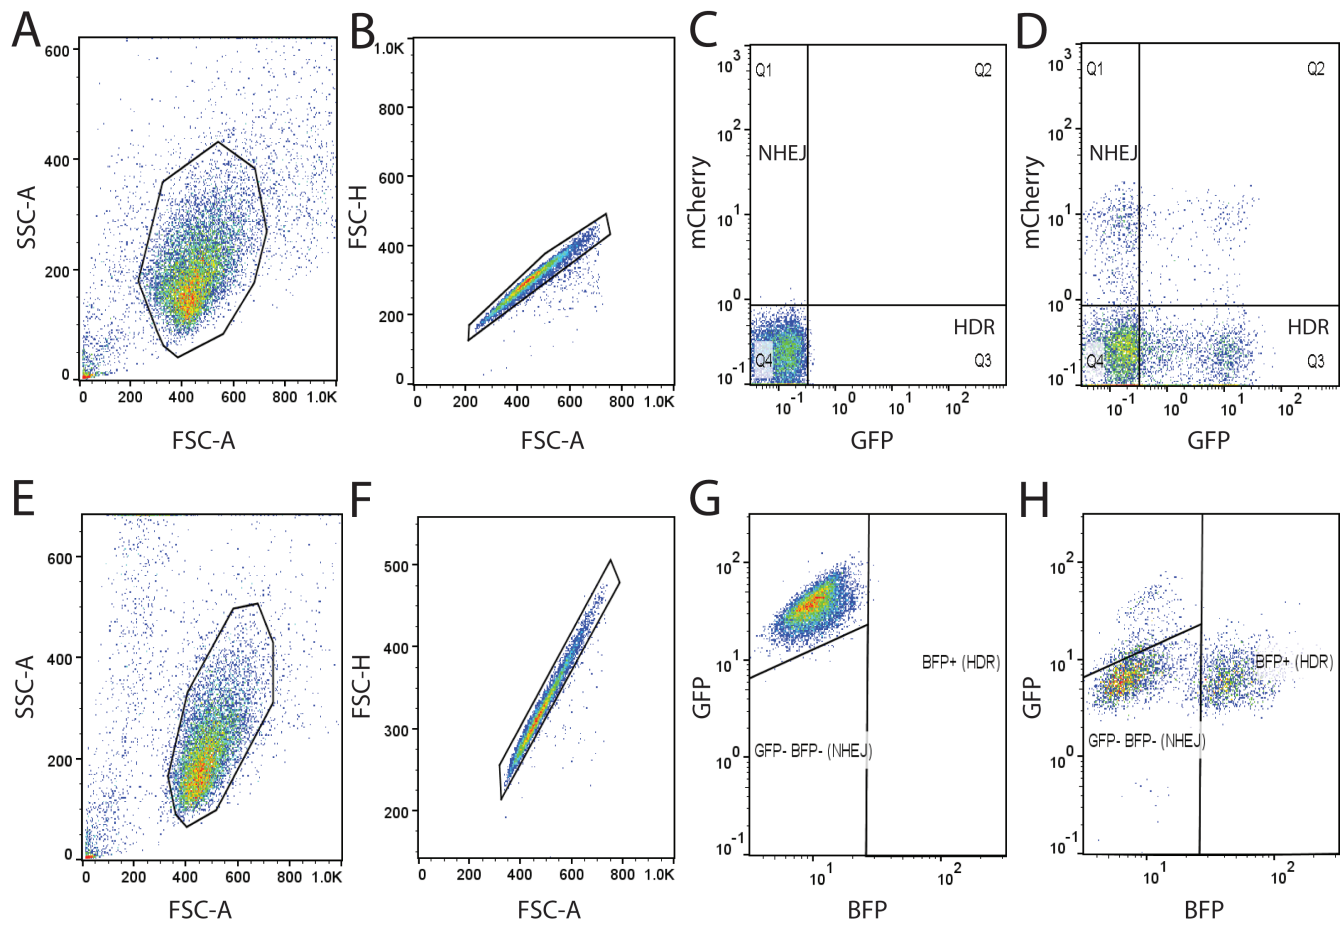

**Figure S9.** Flow cytometry analysis to determine the percentage of precise and imprecise genome editing events. The gating strategies used for HEK293T TLR cells (Top) and K562 GFP+ cells (Bottom) are shown. Cells were first gated based on forward and side scattering to select “live” cells (A, E), and then gated to select singlets (B, F). Quadrant gates were drawn to isolate GFP+ mCherry- cells (indicating successful HDR) and mCherry+ GFP- cells (indicating imprecise repair) for mock-transfected sample (C) and treated sample (D). G, H. K562 GFP+ cells were gated for BFP+ events (precise) and double-negative events (imprecise). Representative mock-transfected (G) and treated (H) samples are shown.



## 1 **Materials and Methods**

2

3 **Synthesis of PNA-NLS peptide.** PNA oligomers were synthesized at 2 $\mu$ mol scale on Fmoc-PAL-  
4 PEG-PS solid support (Applied Biosystems) using an Expedite 8909 synthesizer. Fmoc/Bhoc-  
5 protected PNA monomers (Link Technologies) were dissolved to 0.2M in anhydrous *N*-  
6 methylpyrrolidinone. Amino acid monomers (Sigma Aldrich) and AEEA linker (Link  
7 Technologies) were dissolved to 0.2 M in anhydrous dimethylformamide. Coupling time was 8.5  
8 min using HATU (Alfa Aesar) as activator; double coupling was performed on all PNA monomers  
9 and amino acids. PNAs were cleaved and deprotected by treating the resin with 400  $\mu$ L of 19:1  
10 TFA:*m*-Cresol for 90 min at room temperature. The resin was then removed with a PTFE  
11 centrifugal filter and PNAs were precipitated from cold diethyl ether and resuspended in deionized  
12 water. PNAs were purified by HPLC on a Waters XSelect CSH C18 5 $\mu$ m column at 60 °C, using  
13 gradients of acetonitrile in water containing 0.1% TFA, and were characterized on an Agilent 6530  
14 Q-TOF LC/MS system with electrospray ionization. The PNA::NLS sequence used was  
15 GCGCTCGGCCCTTCC-[AEEA linker]-PKKKRK.

16 **Synthesis of PEGylated oligos.** PEG-modified oligonucleotides were synthesized using standard  
17 phosphoramidite methods on an ABI 394 synthesizer. Phosphoramidites were purchased from  
18 ChemGenes. Coupling times for 2'OMe-RNA and spacer phosphoramidites were extended to 5  
19 min. Oligonucleotides were deprotected in concentrated aqueous ammonia at 55 °C for 16 h.  
20 Oligonucleotides were desalted using either Nap-10 (Sephadex) columns or Amicon ultrafiltration.  
21 All the PEG-modified oligonucleotides were characterized on an Agilent 6530 Q-TOF LC/MS  
22 system with electrospray ionization. The 2'-OMe RNA sequence appended to the 5'-end of donor  
23 DNAs was GGAAGGGCCGAGCGC.

24 **dsDNA Donor generation.** Donor template sequences with the homology arms and the desired  
25 insert for knock-in (eg: gfp), were generated by PCR. PCR products were cloned into ZeroBlunt  
26 TOPO vector (Invitrogen, #450245) and plasmids were purified using Macherey-Nagel midi-prep  
27 kits (cat# 740412.50). Using the purified plasmids as templates and PEGylated oligos as primers,  
28 donor sequences were PCR amplified with Q5 (NEB, *C. elegans*) or Q5 or Phusion polymerase  
29 (NEB, mammalian). Before use in *C. elegans* microinjections, the resulting PEGylated PCR  
30 products were excised from 0.8-1% TAE agarose gel and purified using spin-columns (Omega,  
31 #D2501-02). For use in mammalian cells, the PEGylated long PCR products were purified using  
32 spin columns (Qiagen, # 28104) and short PCR products were gel-extracted (Omega, #D2501-02)  
33 and then purified again with Ampure XP beads.

34 **Single Strand DNA donor generation.** Long single stranded DNA donors were prepared using  
35 the protocol described by Li et al <sup>1</sup>. Briefly, the donor template containing the T7 promoter was  
36 amplified using standard PCR and purified using SPRI magnetic beads (Core Genomics). T7 *in*  
37 *vitro* transcription was performed using the HiScribe T7 High Yield RNA Synthesis kit (NEB) and  
38 the RNA was purified using the SPRI magnetic beads. Finally, the ssDNA donor was synthesized  
39 by TGIRT<sup>TM</sup>-III (InGex) based reverse transcription using the synthesized RNA as a template and  
40 a TEG-modified or unmodified DNA primer. We then performed base-treatment to remove RNA.  
41 The donor was again purified using SPRI beads.

42 **Expression and purification of SpyCas9.** The pMCSG7 vector containing the 6xHis-tagged  
43 3xNLS SpyCas9 was a gift from Scot Wolfe at UMass Medical School. This construct was  
44 transformed into the Rosetta 2 DE3 strain of *E. coli* for protein production. Expression and  
45 purification of SpyCas9 was performed as described previously <sup>2</sup>. Briefly, cells were grown at  
46 37°C to OD600 of 0.6, at which point 1 mM IPTG (Sigma) was added and the temperature was

47 lowered to 18°C. Cells were grown overnight and harvested by centrifugation at 4,000 g. The  
48 protein was purified first by Ni<sup>2+</sup> affinity chromatography, then by cation exchange and finally by  
49 size-exclusion chromatography.

#### 50 **Illumina sequencing (Mammalian cells)**

51 Regions of interest were amplified from genomic DNA and sequenced on an Illumina MiniSeq  
52 platform. PCR1 ((98° C- 2min, 24 cycles of (98° C- 15sec, 64° C- 20sec, 72° C- 15sec), 72° C-  
53 5min) was performed using 200ng gDNA, 1.25uL of 10uM forward and reverse primers that  
54 contain Illumina adapter sequences, 12.5uL NEBNext UltraII Q5 Master Mix, and water to bring  
55 the total volume to 25uL. PCR2 (98° C- 2min, 10 cycles of (98° C- 15sec, 64° C- 20sec, 72° C-  
56 15sec), 72° C- 5min) was done using 1uL of unpurified PCR1 reaction mixture, 1.25 uL of 10uM  
57 forward and reverse primers that contain unique barcode sequences, 12.5uL NEBNext UltraII Q5  
58 Master Mix, and water to bring the total volume to 25uL. PCR2 products were first analyzed using  
59 2% agarose gel electrophoresis, and then similar amounts were pooled based on the band  
60 intensities. Pooled PCR2 products were first purified by gel extraction (Qiagen) and purified again  
61 by PCR cleanup columns (Qiagen). Concentration of final purified library was determined by  
62 Qubit (High Sensitivity DNA assay). The integrity of library was confirmed by Agilent  
63 TapeStation using Agilent High Sensitivity D1000 ScreenTape kit. The library was then sequenced  
64 on an Illumina Miniseq platform according to the manufacturer's instructions using MiniSeq Mid  
65 Output Kit (300-cycles). Sequencing reads were demultiplexed using bcl2fastq2 (Illumina) and  
66 CRISPResso2<sup>3</sup> was used to align the reads and quantify editing efficiencies. Quantification  
67 window size was set as 30 to ensure the stringent analysis. HDR efficiency was calculated as  
68 percentage of (precise HDR reads) / (total reads).

69 **Guide-Seq Experiment.** Two phosphorothioate linkages were incorporated between the first three  
70 and the last three nucleotides in the dsODN tags. Unmodified dsODN does not contain any further  
71 modifications whereas modified dsODN contains 5' TEG (SP9) modification (Integrated DNA  
72 Technologies). Sequencing libraries were prepared as previously described <sup>4</sup>. Data was processed  
73 and analyzed using the GUIDE-seq analysis software <sup>4</sup>.

74

75 **Cell culture and transfections.** HEK293T cells were obtained from ATCC and were cultured in  
76 standard DMEM medium (Gibco, #11995) supplemented with 10% fetal bovine serum (FBS)  
77 (Sigma, #F0392). Human foreskin fibroblasts (HFF) were maintained in DMEM medium  
78 supplemented with 20% FBS. Chinese hamster ovary (CHO) cells (obtained from ATCC) were  
79 cultured in F-12K medium (Gibco 21127022) supplemented with 10% FBS, and K562 cells were  
80 cultured in IMDM medium (Gibco 12440053) supplemented with 10% FBS. Traffic Light  
81 Reporter Multi-Cas Variant 1 (TLR-MCV1) reporter cells were previously described <sup>5</sup>.  
82 Electroporations were performed using the Neon transfection system (ThermoFisher). SpyCas9  
83 was delivered either as a plasmid or as protein. For plasmid delivery of Cas9 and sgRNA,  
84 appropriate amounts of plasmids were mixed in ~10 µl Neon buffer-R (ThermoFisher) followed  
85 by the addition of 100,000 cells. For RNP delivery of Cas9 (IDT), GFP-to-BFP assay (20  
86 pmol Cas9 and 25 pmol of crRNA-tracrRNA), EMX1-HEK293T (5pmol Cas9, 10pmol sgRNA  
87 (IDT)), EMX1-K562 (10pmol Cas9, 20pmol sgRNA), were mixed in 10 µl of buffer R. This  
88 mixture was incubated at room temperature for 30 minutes followed by the addition of 100,000  
89 cells that were already resuspended in buffer R. This mixture was then electroporated using the 10  
90 µl Neon tips. Electroporation parameters (pulse voltage, pulse width, number of pulses) were 1150  
91 v, 20 ms, 2 pulses for HEK293T cells, 1650 v, 10 ms, 3 pulses for CHO cells, 1400 v, 30 ms, 1

92 pulse for HFF cells and 1600 v, 10 ms, 3 pulses for K562 cells. Electroporated cells were harvested  
93 for FACS analysis 48-72 hr post electroporation unless mentioned otherwise.

94

95 **K562 GFP+ stable cell line generation.** Lentiviral vector expressing EGFP was cloned using the  
96 Addgene plasmid #31482. The EGFP sequence was cloned downstream of the SFFV promoter  
97 using Gibson assembly. For lentivirus production, the lentiviral vector was co-transfected into  
98 HEK293T cells along with the packaging plasmids (Addgene 12260 & 12259) in 6-well plates  
99 using TransIT-LT1 transfection reagent (Mirus Bio) as recommended by the manufacturer. After  
100 24 hours, the medium was aspirated from the transfected cells and replaced with fresh 1 ml of fresh  
101 DMEM media. The next day, the supernatant containing the virus from the transfected cells was  
102 collected and filtered through a 0.45  $\mu$ m filter. 10  $\mu$ l of the undiluted supernatant along with 2.5  
103  $\mu$ g of Polybrene was used to transduce ~1 million K562 cells in 6-well plates. The transduced cells  
104 were selected using media containing 2.5  $\mu$ g/ml of puromycin. Less than 20% of the transduced  
105 cells survived, and these were then diluted into 96-well plates to select single clones. One of the  
106 K562 GFP+ clones was used for the analysis shown in this study. Cas9 was electroporated into the  
107 K562 GFP+ cells as RNP (20 pmol) with a crRNA targeting the *GFP* sequence. ssODN (66 nt)  
108 with or without end modifications was provided as donor template to convert the *GFP* coding  
109 sequence to the *BFP* coding sequence. % BFP (+) (HDR) and % GFP (-) BFP (-) (NHEJ) cells  
110 were quantified using flow cytometry.

111

112 **Flow cytometry.** The electroporated cells were analyzed on a MACSQuant VYB from Miltenyi  
113 Biotec. Cells were gated first based on forward and side scattering to select “live” cells and then  
114 for single cells. GFP-positive cells were identified using the blue laser (488 nm) and 525/50 nm

115 filter whereas for the detection of mCherry positive cells, yellow laser (561 nm) and 615/20 nm  
116 filter were used. BFP-positive cells were identified using the violet laser (405 nm) and 450±50 nm  
117 filter. The gating strategy is shown in **Figure S9**.

118

### 119 **Southern Blotting to visualize donor concatemers.**

120 dsDNA donors (566bp) were prepared using DIG labeled dUTP nucleotide mix ((Sigma Aldrich  
121 # 11585550910). 1.5 pmol of gel-extracted DNA was nucleofected into HEK293T (100,000) cells  
122 (Cas9 or guideRNAs were not added to the mix). Nucleofected cells were collected at various time  
123 points and pellets were frozen at -80° C until processed for DNA extraction. Total DNA was  
124 extracted using buffered Phenol: Chloroform: Isoamyl Alcohol and quantified using Qubit (HS-  
125 DNA). Total DNA (genomic + exogenous) of 200ng (0 hr to 24 hr) or about 800ng (48 hr and 72  
126 hr) was used for agarose gel (0.8%) electrophoresis. Higher amounts of DNA were loaded for the  
127 later time points to blot for roughly equal amounts of exogenous DNA and to account for the  
128 increase in total cell number over the time course. 200pg of 566bp and 800pg of 13kb DIG labelled  
129 PCR DNA were used as size markers. After electrophoresis agarose gel was treated with 0.25N  
130 HCl (depurination) for 10 min followed by three washes with distilled water. The gel was then  
131 treated with denaturing solution (0.5M NaOH and 1.5M NaCl) for 20 min and another 30 min with  
132 fresh solution; followed by neutralization (2 washes 10 minutes each) with Alkaline transfer buffer  
133 (5xSSC with 10mM NaOH). Using Alkaline transfer buffer, DNA was then transferred for 3 hours  
134 with upward capillary action onto positively charged nylon membrane (Amersham Hybond N+,  
135 RPN303B). After transfer, membrane was soaked in 5xSSC for 10 min and UV crosslinked. Blots  
136 were then processed using DIG Wash and Block buffer set (Sigma Aldrich # 11585762001)  
137 according to the manufacturer's protocol. Briefly, membrane was blocked in 1x blocking solution

138 with Maleic acid for 30 min, incubated with 1:20,000 Anti-Digoxigenin-AP, Fab fragments (Sigma  
139 Aldrich # 11093274910) in 1x blocking solution for 1 hour, washed twice with 1x wash buffer,  
140 incubated in 1x detection buffer and developed using CDP-star (Sigma Aldrich # 12041677001).

141

142 ***C. elegans* microinjection and HDR screening.** Microinjections were performed using Cas9-  
143 RNPs as previously described <sup>6</sup>. dsDNA donors were generated by PCR; 25ng/μl of unmodified  
144 or end-modified dsDNA donors were used in each injection mixture. Donors were heated and  
145 quick-cooled as previously described <sup>6</sup>. Starting strain that is homozygous for  
146 3XFLAG::GlyGlyGly::TEV::CSR-1 allele was used to knock-in *gfp* sequence between flag and  
147 glycine-linker. crRNA (CTATAAAGACGATGACGATA NGG) with PAM site in the glycine-  
148 linker and donor DNA with arms homologous to 35 bp of 3xflag and 30 bp of 3xglycine-linker::tev  
149 flanking the *gfp* sequence were used. Loss of function WM702 (*eft3p::gfp(ne4807)*) reporter strain  
150 was generated in EG6070 (oxSi221 [eft-3p::GFP + Cbr-unc-119(+)] II) strain background using  
151 CMG-48 and CMG-49 guides (See Supplemental Table S1). *Rol-6 (su1006)* plasmid was used as  
152 co-injection marker. This marker plasmid forms episomal non-integrating extrachromosomal  
153 elements that transiently mark a subset of progeny by causing them to exhibit an easily scored  
154 Roller phenotype. Under the conditions used, high quality injections into both gonad arms yielded  
155 20 to 40 Roller progenies from each injected animal. For each donor type entire F1 broods from  
156 four or more injected animals were scored and tabulated the total number of GFP positive progeny  
157 and the number of GFP positive Roller progeny.

158

159

160

## 161 **Zebrafish Experiments**

### 162 Fish Care

163 Fish were maintained in accordance with the protocols set by the University of Massachusetts  
164 Medical School Institutional Animal Care and Use Committee. All the injections were performed  
165 into embryos derived from in-crosses of the EK wildtype line.

### 166 Zebrafish zygote microinjections

167 One cell-staged embryos were injected with 30pg of either unmodified or end-modified donors  
168 together with 24fmol RNP of modified Cas12a protein (Lb-2C-Cas12a) and modified crRNA (dr  
169 crRNA) per embryo as described previously <sup>7</sup>, targeting 5' end of the *hey2* coding sequence.  
170 Embryos were incubated for 24 hours post injection, genomic DNA was extracted and libraries for  
171 amplicon sequencing were prepared. For library construction, linear amplification using a single  
172 primer containing UMI was performed first, followed by PCRs for exponential amplification and  
173 barcode stitching were performed as described previously <sup>7</sup>. Quantification of the reads containing  
174 indels and precise knock-ins of Avi-tag was performed using the Python script deposited at the  
175 Github repository:  
176 ([https://github.com/locusliu/PCR\\_Amplicon\\_target\\_deep\\_seq/blob/master/CRESA-lpp.py](https://github.com/locusliu/PCR_Amplicon_target_deep_seq/blob/master/CRESA-lpp.py)). All  
177 the experiments were performed in three independent replicates except injections with unmodified  
178 donors which were performed in duplicates.

179

## 180 **Mouse Experiments**

181 Strains and microinjection: All the mouse experiments were conducted according the UMMS  
182 Institute Animal Care and Use Committee (IACUC). C57BL/6J (Stock #000664) and Swiss  
183 Webster (Stock #SW) were obtained from Jackson Laboratory and Taconic respectively. All the



184 animals were maintained in a 12 hr light/dark cycle. Superovulated females were mated, and their  
185 zygotes were collected at E0.5. Male pronuclei were injected with the injection mixtures described  
186 below. Finally, zygotes were transferred to pseudo pregnant recipients and allowed to go to term.  
187 Donor preparation: Using plasmids as templates and either unmodified or end-modified oligos as  
188 primers, donor sequences were PCR amplified with Q5 polymerase (NEB). The resulting PCR  
189 products were excised from 0.8% TAE agarose gel and purified using spin-columns (Omega,  
190 #D2500). Gel-extracted DNA was further purified with 1.5X AMPure XP (Beckman Coulter)  
191 beads according to the manufacture's protocol and eluted in nuclease free water. Before use in  
192 microinjection mixes, dsDNA donors were subjected to heating and cooling protocol in thermal  
193 cyclers as described previously <sup>6</sup>.

194 Injection Mixture preparation: Injections mixes were prepared with the following final  
195 concentrations: S.p. Cas9 Protein (50 ng/μl) (IDT); S.p. Cas9 mRNA (50 ng/μl) (TriLink; L-7206);  
196 sgRNA (20 ng/μl) (IDT); dsDNA donor (1 ng/μl). Cas9 protein, sgRNA and TE (pH 7.5) were  
197 incubated at 37° C for 20 min. This mixture was then equally split into two tubes and the following  
198 components were added to each tube: Cas9 mRNA, dsDNA donor (either unmodified or 5' 2'OMe-  
199 RNA::TEG modified), TE (pH 7.5) to bring the total volume to 50 μl. After pipetting well, the  
200 final injection mixtures were centrifuged at 14,000g for 2 min and 46 μl was taken from the top  
201 (to avoid particles that may clog the needles) and transferred to fresh tubes. All the steps were  
202 performed at room temperature. Mixtures were kept on ice and directly loaded into the needles for  
203 microinjection.

204 Genotyping: Tail clips of *Sox2-V5* founder animals were collected at P10, genotyped by PCR and  
205 Sanger sequenced to confirm precise insertion. To confirm germline transmission, some of the

206 HDR positive F0 animals were mated with WT animals and tail clips of F1 animals were  
207 genotyped.

208 **Oligo Sequences.** Sequences of all the guide RNAs used in this study are provided in  
209 Supplemental Table S1 and sequences of all the oligos used are provided in Supplemental Table  
210 S2.

211

212 **Statistics.** All the statistical analyses were performed using GraphPad Prism. The type of  
213 analysis performed, and the P-value information can be found in respective figure legends.

214

215 **Data availability.** All the data supporting the findings of this study are available within the  
216 paper and supplementary information. Any other data related to this manuscript are available  
217 upon reasonable request.

218

## 219 **References**

220

221 1 Li, H. *et al.* Design and specificity of long ssDNA donors for CRISPR-based knock-in.  
222 *bioRxiv*, 178905, doi:10.1101/178905 (2019).

223 2 Jinek, M. *et al.* A programmable dual-RNA-guided DNA endonuclease in adaptive  
224 bacterial immunity. *Science* **337**, 816-821, doi:10.1126/science.1225829 (2012).

225 3 Clement, K. *et al.* CRISPResso2 provides accurate and rapid genome editing sequence  
226 analysis. *Nat Biotechnol* **37**, 224-226, doi:10.1038/s41587-019-0032-3 (2019).

227 4 Tsai, S. Q. *et al.* GUIDE-seq enables genome-wide profiling of off-target cleavage by  
228 CRISPR-Cas nucleases. *Nat Biotechnol* **33**, 187-197, doi:10.1038/nbt.3117 (2015).

- 229 5 Iyer, S. *et al.* Efficient Homology-directed Repair with Circular ssDNA Donors. *bioRxiv*,  
230 864199, doi:10.1101/864199 (2019).
- 231 6 Ghanta, K. S. & Mello, C. C. Melting dsDNA Donor Molecules Greatly Improves  
232 Precision Genome Editing in *Caenorhabditis elegans*. *Genetics* **216**, 643-650,  
233 doi:10.1534/genetics.120.303564 (2020).
- 234 7 Liu, P. *et al.* Enhanced Cas12a editing in mammalian cells and zebrafish. *Nucleic Acids*  
235 *Res* **47**, 4169-4180, doi:10.1093/nar/gkz184 (2019).
- 236
